# Supplementary material for: Fire, vegetation, and Holocene climate in a southeastern Tibetan lake: a multi-biomarker reconstruction from Paru Co
Source: Copernicus journal article supplement (doi:10.5194/cp-14-1543-2018), 2018-10-23
Supplement: Supplementary file 1 [file cp-14-1543-2018-supplement.zip]

Archive with 3 entries (3 files):
- cp-14-1543-2018-supplement-title-page.pdf
- Supplementary Information_Dataset (2).xls
- Supplementary Information (1).docx
