# Supplementary material for: Fire, vegetation, and Holocene climate in a southeastern Tibetan lake: a multi-biomarker reconstruction from Paru Co
Source: Copernicus journal article supplement (doi:10.5194/cp-14-1543-2018), 2018-10-23
Supplement: Supplementary file 1 [file cp-14-1543-2018-supplement.zip › cp-14-1543-2018-supplement-title-page.pdf]

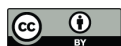

## *Supplement of*

# **Fire, vegetation, and Holocene climate in a southeastern Tibetan lake: a multi-biomarker reconstruction from Paru Co**

**Alice Callegaro et al.**

*Correspondence to:* Alice Callegaro ([alice.callegaro@unive.it](mailto:alice.callegaro@unive.it)) and Natalie M. Kehrwald ([nkehrwald@usgs.gov](mailto:nkehrwald@usgs.gov))

- [cp-14-1543-2018-supplement-title-page.pdf](#)
- [Supplementary Information \(1\).docx](#)
- [Supplementary Information\\_Dataset \(2\).xls](#)

The copyright of individual parts of the supplement might differ from the CC BY 4.0 License.
