# Supplementary material for: Fire, vegetation, and Holocene climate in a southeastern Tibetan lake: a multi-biomarker reconstruction from Paru Co
Source: Copernicus journal article supplement (doi:10.5194/cp-14-1543-2018), 2018-10-23
Supplement: Supplementary file 1 [file cp-14-1543-2018-supplement.zip › Supplementary Information_Dataset (2).xls]

## Sheet: Data
Variables
Short_name	What	Material	Error	Units	Seasonality	Data_Type	Detail	Method
Depth	actual composite depth	sediment		centimeter		Paleolimnology
Age	age	sediment		calendar years before present		Paleolimnology
sed_rate	sedimentation rate	sediment		centimeter per year		Paleolimnology
wet_density	wet density	sediment		gram per cubic centimeter		Paleolimnology
L	levoglucosan	sediment		nanogram per gram		Paleolimnology		ion chromatography - mass spectrometry
M	mannosan	sediment		nanogram per gram		Paleolimnology		ion chromatography - mass spectrometry
G	galactosan	sediment		nanogram per gram		Paleolimnology		ion chromatography - mass spectrometry
L_flux	levoglucosan flux	sediment		nanogram per centimeter square per year		Paleolimnology		ion chromatography - mass spectrometry
M_flux	mannosan flux	sediment		nanogram per centimeter square per year		Paleolimnology		ion chromatography - mass spectrometry
G_flux	galactosan flux	sediment		nanogram per centimeter square per year		Paleolimnology		ion chromatography - mass spectrometry
L/M	levoglucosan/mannosan	sediment		dimensionless		Paleolimnology
L/M	levoglucosan/mannosan	sediment	range	dimensionless		Paleolimnology
L/(M+G)	levoglucosan/(mannosan+galactosan)	sediment		dimensionless		Paleolimnology
L/(M+G)	levoglucosan/(mannosan+galactosan)	sediment	range	dimensionless		Paleolimnology
Naph	Naphthalene	sediment		nanogram per gram		Paleolimnology		gas chromatography - mass spectrometry
Acy	Acenaphthylene	sediment		nanogram per gram		Paleolimnology		gas chromatography - mass spectrometry
Ace	Acenaphthene	sediment		nanogram per gram		Paleolimnology		gas chromatography - mass spectrometry
Flu	Fluorene	sediment		nanogram per gram		Paleolimnology		gas chromatography - mass spectrometry
Phe	Phenanthrene	sediment		nanogram per gram		Paleolimnology		gas chromatography - mass spectrometry
Ant	Anthracene	sediment		nanogram per gram		Paleolimnology		gas chromatography - mass spectrometry
FluA	Fluoranthene	sediment		nanogram per gram		Paleolimnology		gas chromatography - mass spectrometry
Pyr	Pyrene	sediment		nanogram per gram		Paleolimnology		gas chromatography - mass spectrometry
BaAnt	Benzo(a)Anthracene	sediment		nanogram per gram		Paleolimnology		gas chromatography - mass spectrometry
Chr	Chrysene	sediment		nanogram per gram		Paleolimnology		gas chromatography - mass spectrometry
Ret	Retene	sediment		nanogram per gram		Paleolimnology		gas chromatography - mass spectrometry
BbFl	Benzo(b)Fluoranthene	sediment		nanogram per gram		Paleolimnology		gas chromatography - mass spectrometry
Bkfl	Benzo(k)Fluoranthene	sediment		nanogram per gram		Paleolimnology		gas chromatography - mass spectrometry
Bapyr	Benzo(a)Pyrene	sediment		nanogram per gram		Paleolimnology		gas chromatography - mass spectrometry
Bepyr	Benzo(e)Pyrene	sediment		nanogram per gram		Paleolimnology		gas chromatography - mass spectrometry
Bghi	Benzo(ghi)Perylene	sediment		nanogram per gram		Paleolimnology		gas chromatography - mass spectrometry
IP	Indeno(1,2,3-c,d)Pyrene	sediment		nanogram per gram		Paleolimnology		gas chromatography - mass spectrometry
DbahAnt	Dibenzo(A,H)Anthracene	sediment		nanogram per gram		Paleolimnology		gas chromatography - mass spectrometry
Ant/(Ant+Phe)	ratio Ant/(Ant+Phe)	sediment		dimensionless		Paleolimnology
Ant/(Ant+Phe)	ratio Ant/(Ant+Phe)	sediment	range	dimensionless		Paleolimnology
IP/(IP+Bghi)	ratio IP/(IP+Bghi)	sediment		dimensionless		Paleolimnology
IP/(IP+Bghi)	ratio IP/(IP+Bghi)	sediment	range	dimensionless		Paleolimnology
FluA/(FluA+Pyr)	ratio FluA/(FluA+Pyr)	sediment		dimensionless		Paleolimnology
FluA/(FluA+Pyr)	ratio FluA/(FluA+Pyr)	sediment	range	dimensionless		Paleolimnology
3-rings	sum of Phe+Ant+Flua	sediment		nanogram per gram		Paleolimnology
3-rings	sum of Phe+Ant+Flua	sediment	range	nanogram per gram		Paleolimnology
4-rings	sum of Pyr+BaAnt+Chr+Ret+BbFl+Bkfl	sediment		nanogram per gram		Paleolimnology
4-rings	sum of Pyr+BaAnt+Chr+Ret+BbFl+Bkfl	sediment	range	nanogram per gram		Paleolimnology
5-rings	sum of Bapyr+Bepyr+Bghi+IP+DbahAnt	sediment		nanogram per gram		Paleolimnology
5-rings	sum of Bapyr+Bepyr+Bghi+IP+DbahAnt	sediment	range	nanogram per gram		Paleolimnology
tot_PAH	sum of total PAHs	sediment		nanogram per gram		Paleolimnology
tot_PAH	sum of total PAHs	sediment	range	nanogram per gram		Paleolimnology
Cop	Coprostanol	sediment		nanogram per centimeter square per year		Paleolimnology		gas chromatography - mass spectrometry
e-Cop	Epicoprostanol	sediment		nanogram per centimeter square per year		Paleolimnology		gas chromatography - mass spectrometry
Chl	Cholesterol	sediment		nanogram per centimeter square per year		Paleolimnology		gas chromatography - mass spectrometry
5α-Ch	Cholestanol	sediment		nanogram per centimeter square per year		Paleolimnology		gas chromatography - mass spectrometry
5α-Sit	Sitostanol	sediment		nanogram per centimeter square per year		Paleolimnology		gas chromatography - mass spectrometry
Sit	Sitosterol	sediment		nanogram per centimeter square per year		Paleolimnology		gas chromatography - mass spectrometry
Paq	Paqueous ratio	sediment		dimensionless		Paleolimnology
Norm31	grass to wood C31/(C31+C29)	sediment		dimensionless		Paleolimnology
ACL21-33	average chain lenght from C21 to C33	sediment		dimensionless		Paleolimnology
CPI21-33	carbon preference index from C21 to C33	sediment		dimensionless		Paleolimnology
C10	n-alkane C10	sediment		nanogram per gram		Paleolimnology		gas chromatography - mass spectrometry
C11	n-alkane C11	sediment		nanogram per gram		Paleolimnology		gas chromatography - mass spectrometry
C12	n-alkane C12	sediment		nanogram per gram		Paleolimnology		gas chromatography - mass spectrometry
C13	n-alkane C13	sediment		nanogram per gram		Paleolimnology		gas chromatography - mass spectrometry
C14	n-alkane C14	sediment		nanogram per gram		Paleolimnology		gas chromatography - mass spectrometry
C15	n-alkane C15	sediment		nanogram per gram		Paleolimnology		gas chromatography - mass spectrometry
C16	n-alkane C16	sediment		nanogram per gram		Paleolimnology		gas chromatography - mass spectrometry
C17	n-alkane C17	sediment		nanogram per gram		Paleolimnology		gas chromatography - mass spectrometry
C18	n-alkane C18	sediment		nanogram per gram		Paleolimnology		gas chromatography - mass spectrometry
C19	n-alkane C19	sediment		nanogram per gram		Paleolimnology		gas chromatography - mass spectrometry
C20	n-alkane C20	sediment		nanogram per gram		Paleolimnology		gas chromatography - mass spectrometry
C21	n-alkane C21	sediment		nanogram per gram		Paleolimnology		gas chromatography - mass spectrometry
C22	n-alkane C22	sediment		nanogram per gram		Paleolimnology		gas chromatography - mass spectrometry
C23	n-alkane C23	sediment		nanogram per gram		Paleolimnology		gas chromatography - mass spectrometry
C24	n-alkane C24	sediment		nanogram per gram		Paleolimnology		gas chromatography - mass spectrometry
C25	n-alkane C25	sediment		nanogram per gram		Paleolimnology		gas chromatography - mass spectrometry
C26	n-alkane C26	sediment		nanogram per gram		Paleolimnology		gas chromatography - mass spectrometry
C27	n-alkane C27	sediment		nanogram per gram		Paleolimnology		gas chromatography - mass spectrometry
C28	n-alkane C28	sediment		nanogram per gram		Paleolimnology		gas chromatography - mass spectrometry
C29	n-alkane C29	sediment		nanogram per gram		Paleolimnology		gas chromatography - mass spectrometry
C30	n-alkane C30	sediment		nanogram per gram		Paleolimnology		gas chromatography - mass spectrometry
C31	n-alkane C31	sediment		nanogram per gram		Paleolimnology		gas chromatography - mass spectrometry
C32	n-alkane C32	sediment		nanogram per gram		Paleolimnology		gas chromatography - mass spectrometry
C33	n-alkane C33	sediment		nanogram per gram		Paleolimnology		gas chromatography - mass spectrometry
C34	n-alkane C34	sediment		nanogram per gram		Paleolimnology		gas chromatography - mass spectrometry
C35	n-alkane C35	sediment		nanogram per gram		Paleolimnology		gas chromatography - mass spectrometry
Data
Missing Value	n.a.
Depth	Age	sed_rate	wet_density	L	M	G	L_flux	M_flux	G_flux	L/M	L/M	L/(M+G)	L/(M+G)	Naph	Acy	Ace	Flu	Phe	Ant	FluA	Pyr	BaAnt	Chr	Ret	BbFl	Bkfl	Bapyr	Bepyr	Bghi	IP	DbahAnt	Ant/(Ant+Phe)	Ant/(Ant+Phe)	IP/(IP+Bghi)	IP/(IP+Bghi)	FluA/(FluA+Pyr)	FluA/(FluA+Pyr)	3-rings	3-rings	4-rings	4-rings	5-rings	5-rings	tot_PAH	tot_PAH	Cop	e-Cop	Chl	5α-Ch
54.84	1347.26	0.035	1.01637	n.a.	n.a.	n.a.	n.a.	n.a.	n.a.	n.a.	n.a.	n.a.	n.a.	138.222	20.5069	59.4649	43.2719	170.593	15.578	42.6535	43.7126	2.3123	8.24634	4.2	37.2522	9.41898	36.125	258.45	n.a.	n.a.	n.a.	0.0836759	0.0251028	n.a.	n.a.	0.493869	0.148161	228.825	34.3237	105.142	15.7714	294.575	44.1863	890.008	133.501	n.a.	n.a.	n.a.	n.a.
59.42	1475.49	0.035	1.01681	408.696	85.1062	67.4169	14.5449	3.0288	2.39926	4.80219	1.92088	2.67957	1.07183	168.859	14.7001	18.7428	28.1484	122.406	13.6105	33.975	38.4652	5.64398	9.21753	4.70566	4.77724	2.96829	11.5823	93.6147	1.42187	6.42143	n.a.	0.100065	0.0300195	0.818715	0.327486	0.469008	0.140702	169.992	25.4988	65.7779	9.86668	113.04	16.956	579.261	86.8891	n.a.	n.a.	n.a.	n.a.
64.51	1619.59	0.035	1.01242	264.452	34.6767	34.6355	9.37074	1.22875	1.22729	7.62621	3.05048	3.81537	1.52615	110.765	21.959	73.2219	33.5105	148.291	10.1132	63.6036	81.894	9.84394	19.0655	14.7889	2.52565	2.21528	58.1635	65.9572	n.a.	n.a.	n.a.	0.0638442	0.0191533	n.a.	n.a.	0.437146	0.131144	222.008	33.3012	130.333	19.55	124.121	18.6181	715.919	107.388	n.a.	n.a.	n.a.	n.a.
70.11	1779.98	0.035	1.0124	566.408	n.a.	50.061	20.0701	n.a.	1.77386	n.a.	n.a.	n.a.	n.a.	106.317	22.3757	69.4	25.9661	147.334	3.64451	60.6255	55.1909	10.2074	15.5248	12.9764	n.a.	n.a.	20.5536	109.76	1.93071	5.64723	n.a.	0.0241392	0.00724177	0.74522	0.298088	0.523462	0.157039	211.604	31.7407	93.8995	14.0849	137.892	20.6838	667.454	100.118	n.a.	n.a.	n.a.	n.a.
74.7	1912.84	0.035	1.01075	743.478	68.0896	105.144	26.3014	2.40875	3.71959	10.9191	4.36765	4.29176	1.7167	87.7268	43.2285	66	76.6359	170.91	20.2792	35.4231	53.2411	9.93916	12.2285	11.1639	n.a.	n.a.	18.2029	229.387	0.95	13.7655	n.a.	0.106069	0.0318206	0.935442	0.374177	0.39952	0.119856	226.612	33.9919	86.5727	12.9859	262.306	39.3458	849.082	127.362	n.a.	n.a.	n.a.	n.a.
79.79	2061.58	0.035	1.01664	622.63	199.152	118.32	22.1546	7.08632	4.21009	3.1264	1.25056	1.96121	0.784485	13.5625	15.1518	66.8868	27.5883	108.026	14.7758	18.1143	39.2645	14.3516	17.6124	11.6244	n.a.	n.a.	16.0131	140.845	n.a.	n.a.	35.9526	0.120323	0.0360969	n.a.	n.a.	0.315697	0.094709	140.916	21.1374	82.853	12.4279	192.811	28.9216	539.769	80.9653	0.087492	0.149963	n.a.	n.a.
85.39	2226.86	0.035	1.01607	1787.06	61.5652	99.4106	63.5522	2.1894	3.53527	29.0272	11.6109	11.1014	4.44058	60.3485	40.9769	58.5126	59.6964	199.745	34.1222	50.857	75.2489	18.764	22.9964	8.74685	n.a.	n.a.	22.6948	180.531	4.1042	11	2.07399	0.145904	0.0437713	0.728274	0.29131	0.403288	0.120986	284.724	42.7086	125.756	18.8634	220.404	33.0606	850.418	127.563	n.a.	n.a.	n.a.	n.a.
89.97	2363.25	0.035	1.01674	778.245	44.3407	65.3502	27.6945	1.5779	2.32554	17.5515	7.02059	7.09489	2.83796	92.4442	25.2475	40.1331	37.7695	147.109	12.2495	24.4814	40.4735	6.6165	6.09214	11.4087	n.a.	n.a.	13.0428	120.867	n.a.	n.a.	n.a.	0.0768677	0.0230603	n.a.	n.a.	0.376899	0.11307	183.84	27.5759	64.5909	9.68863	133.91	20.0865	577.935	86.6902	n.a.	n.a.	n.a.	n.a.
96.08	2546.82	0.035	1.01233	1375.27	136.112	165.703	48.7279	4.82267	5.87111	10.1039	4.04157	4.55666	1.82266	33.8092	26.9439	94.0796	41.8597	116.174	12.7149	17.6411	36.2821	5.4695	7.16067	9.23167	n.a.	n.a.	11.9161	68.4397	n.a.	n.a.	n.a.	0.09865	0.029595	n.a.	n.a.	0.327152	0.0981455	146.53	21.9796	58.144	8.7216	80.3558	12.0534	481.723	72.2584	n.a.	n.a.	n.a.	n.a.
101.17	2701.07	0.035	1.01227	905.973	85.3857	159.122	32.0981	3.02516	5.63758	10.6104	4.24414	3.7053	1.48212	139.171	8.24824	39.7477	38.8916	124.922	12.7598	35.7754	35.3933	4.32251	8.2292	12.6157	2.51599	2.31538	10.3535	49.0353	n.a.	n.a.	n.a.	0.092676	0.0278028	n.a.	n.a.	0.502684	0.150805	173.457	26.0185	65.3921	9.80882	59.3888	8.90831	524.296	78.6444	n.a.	n.a.	n.a.	n.a.
106.77	2872.11	0.035	1.01363	280.258	n.a.	88.5369	9.94278	n.a.	3.14104	n.a.	n.a.	n.a.	n.a.	129.505	13.3181	27.9609	27.033	122.163	9.08584	34.085	41.1877	4.74674	13.9021	14.3425	5.63727	5.89761	13.367	40.338	n.a.	n.a.	n.a.	0.0692259	0.0207678	n.a.	n.a.	0.45282	0.135846	165.334	24.8001	85.714	12.8571	53.7049	8.05574	502.57	75.3855	n.a.	n.a.	n.a.	n.a.
111.36	3013.27	0.035	1.01201	1437.61	172.023	370.675	50.9206	6.09313	13.1294	8.35705	3.34282	2.649	1.0596	37.0251	13.3157	21.0821	49.8507	78.5089	10.6852	29.2287	34.6011	3.80241	10.7643	7.67485	9.56388	n.a.	33.3759	75.3622	n.a.	n.a.	n.a.	0.119797	0.0359391	n.a.	n.a.	0.457916	0.137375	118.423	17.7634	66.4066	9.96099	108.738	16.3107	414.841	62.2262	n.a.	n.a.	n.a.	n.a.
116.45	3170.77	0.035	1.01516	29.1422	n.a.	25.0169	1.03544	n.a.	0.888863	n.a.	n.a.	n.a.	n.a.	28.0957	10.2321	14.2032	25.8254	135.257	9.43728	26.151	20.1722	2.85807	7.62653	19.594	6.42198	9.41396	53.3849	110.386	n.a.	n.a.	4.87422	0.0652223	0.0195667	n.a.	n.a.	0.564533	0.16936	170.845	25.6267	66.0868	9.91301	168.646	25.2968	483.934	72.59	n.a.	n.a.	n.a.	n.a.
121.03	3313.31	0.035	1.013	277.472	n.a.	91.4555	9.83777	n.a.	3.24256	n.a.	n.a.	n.a.	n.a.	185.475	15.8482	17.8638	31.5673	166.306	14.9968	45.1866	40.6355	5.91142	13.461	25.7208	12.1932	7.17119	39.2984	109.197	n.a.	n.a.	n.a.	0.0827172	0.0248152	n.a.	n.a.	0.526514	0.157954	226.489	33.9733	105.093	15.764	148.495	22.2743	730.831	109.625	n.a.	n.a.	n.a.	n.a.
127.14	3504.58	0.035	1.01081	692.214	n.a.	165.363	24.4894	n.a.	5.85029	n.a.	n.a.	n.a.	n.a.	177.51	15.85	18.3	34.17	229.919	22.459	80.3039	70.2228	8.96476	19.2954	27.3592	19.9477	21.3555	33.5124	226.582	n.a.	n.a.	n.a.	0.0889896	0.0266969	n.a.	n.a.	0.533486	0.160046	332.681	49.9022	167.145	25.0718	260.094	39.0141	1005.75	150.863	n.a.	n.a.	n.a.	0.0418558
132.23	3664.82	0.035	1.0126	565.574	n.a.	129.676	20.0445	n.a.	4.59584	n.a.	n.a.	n.a.	n.a.	34.9361	15.8664	18.6084	35.9213	94.2145	8.89344	33.3419	32.2609	3.86929	8.33268	12.9145	2.9135	6.51161	27.7264	101.507	n.a.	n.a.	n.a.	0.0862537	0.0258761	n.a.	n.a.	0.508239	0.152472	136.45	20.4675	66.8025	10.0204	129.233	19.385	437.818	65.6727	n.a.	n.a.	n.a.	n.a.
136.31	3793.82	0.035	1.01009	621.553	63.0189	98.2637	21.9739	2.22792	3.47395	9.86297	3.94519	3.85381	1.54153	84.0203	17.1007	18.4776	48.1757	156.333	13.0349	27.6876	37.4214	2.61113	4.94833	11.9139	n.a.	n.a.	14.3415	36.5574	1	13.9505	4.92771	0.076962	0.0230886	0.933113	0.373245	0.42525	0.127575	197.055	29.5583	56.8948	8.53422	70.7772	10.6166	492.502	73.8752	n.a.	n.a.	n.a.	0.555294
140.55	3928.34	0.035	1.01192	852.389	n.a.	80.125	30.1894	n.a.	2.83782	n.a.	n.a.	n.a.	n.a.	103.648	16.0231	26.1667	36.5702	158.56	17.1763	29.0796	28.4932	11.1156	9.05459	8.56224	6.30337	n.a.	17.3028	177.879	2.7204	5.8507	n.a.	0.0977393	0.0293218	0.682608	0.273043	0.505092	0.151528	204.816	30.7223	63.529	9.52935	203.753	30.5629	654.505	98.1758	n.a.	n.a.	n.a.	n.a.
144.81	4063.96	0.035	1.01365	881.841	121.332	144.491	31.2857	4.30458	5.12619	7.26801	2.9072	3.31741	1.32696	55.2	11.9868	22.1889	38.3344	82.6123	10.134	14.7435	32.4531	9.45106	8.91476	5.10676	n.a.	n.a.	12.4829	55.8188	1.22253	3.64522	n.a.	0.109266	0.0327798	0.748851	0.29954	0.312385	0.0937155	107.49	16.1235	55.9256	8.38885	73.1695	10.9754	364.295	54.6442	n.a.	n.a.	n.a.	n.a.
148.36	4177.29	0.035	1.01531	580.741	72.7655	145.744	20.6372	2.58579	5.17916	7.981	3.1924	2.65774	1.06309	32.7364	23.5407	30.996	46.9944	177.853	10.2281	31.2032	57.7361	7.78655	8.77493	8.20218	n.a.	n.a.	27.2275	49.5853	1.12	7.06562	n.a.	0.0543811	0.0163143	0.863175	0.34527	0.350837	0.105251	219.285	32.8927	82.4997	12.375	84.9984	12.7498	521.05	78.1576	n.a.	n.a.	n.a.	n.a.
153.95	4356.27	0.035	1.01272	1000.64	105.553	120.906	35.4677	3.74134	4.28553	9.47994	3.79197	4.41862	1.76745	48.5104	10.5053	17.4249	20.7495	62.9527	12.9428	12.8093	28.8838	4.58315	3.90201	4.99538	n.a.	n.a.	12.5119	48.6761	n.a.	n.a.	n.a.	0.170535	0.0511604	n.a.	n.a.	0.307228	0.0921683	88.7048	13.3057	42.3644	6.35465	61.188	9.1782	289.447	43.4171	n.a.	n.a.	n.a.	n.a.
159.04	4519.75	0.035	1.01216	548.645	n.a.	134.762	19.4361	n.a.	4.77402	n.a.	n.a.	n.a.	n.a.	167.87	13.7925	18.6513	25.947	96.5564	14.803	37.0629	34.5859	5.36815	10.0216	9.79244	3.34695	5.82707	33.1186	81.6247	n.a.	n.a.	n.a.	0.13293	0.039879	n.a.	n.a.	0.517286	0.155186	148.422	22.2634	68.9421	10.3413	114.743	17.2115	558.369	83.7553	n.a.	n.a.	n.a.	n.a.
163.1	4650.45	0.035	1.00975	865.94	n.a.	167.127	30.6035	n.a.	5.90649	n.a.	n.a.	n.a.	n.a.	148.487	19.4221	22.2407	31.3678	105.797	25.3832	31.9138	42.1434	6.4252	10.2398	4.72759	0.53107	3.82114	15.5103	58.0307	1.25079	6.81924	n.a.	0.193499	0.0580496	0.845008	0.338003	0.430934	0.12928	163.094	24.4641	67.8882	10.1832	81.6111	12.2417	534.11	80.1166	n.a.	n.a.	n.a.	n.a.
168.69	4830.76	0.035	1.01023	435.035	n.a.	n.a.	15.382	n.a.	n.a.	n.a.	n.a.	n.a.	n.a.	147.636	45.5024	59.574	82.5929	229.353	25.2806	112.164	123.575	12.6198	27.5243	24.0485	8.70708	7.5386	48.5607	68.7997	n.a.	n.a.	n.a.	0.0992823	0.0297847	n.a.	n.a.	0.475798	0.142739	366.797	55.0196	204.013	30.6019	117.36	17.604	1023.48	153.521	n.a.	n.a.	n.a.	n.a.
174.28	5011.43	0.035	1.00961	889.866	87.1681	192.369	31.4446	3.08021	6.79763	10.2086	4.08345	3.18335	1.27334	133.85	16.28	64.412	7.36344	100.285	9.37539	42.8074	43.2534	5.81847	15.9825	14.1008	5.47575	4.88308	9.9281	99.9933	n.a.	n.a.	n.a.	0.0854947	0.0256484	n.a.	n.a.	0.497408	0.149223	152.468	22.8702	89.514	13.4271	109.921	16.4882	573.808	86.0713	n.a.	n.a.	n.a.	n.a.
178.86	5159.65	0.035	1.01062	137.094	n.a.	n.a.	4.84925	n.a.	n.a.	n.a.	n.a.	n.a.	n.a.	160.335	41.788	51.99	47.0137	213.217	18.346	197.744	77.6639	24.3441	20.0793	5.82972	20.7936	5.36128	36.2831	169.969	3.70255	5.73934	n.a.	0.0792269	0.0237681	0.60786	0.243144	0.718004	0.215401	429.307	64.3961	154.072	23.1108	215.694	32.3542	1100.2	165.03	n.a.	n.a.	n.a.	0.539558
183.43	5307.68	0.035	1.01403	1528.36	46.2156	194.856	54.2435	1.64024	6.91568	33.0704	13.2281	6.33987	2.53595	38.1475	7.88579	6.18157	16.8304	63.4681	8.48581	14.1519	22.3839	3.2559	4.81719	4.38288	n.a.	n.a.	13.0099	71.7251	0.9	2.35637	27.2529	0.117934	0.0353802	0.723619	0.289447	0.387344	0.116203	86.1059	12.9159	34.8399	5.22598	115.244	17.2866	305.235	45.7853	n.a.	n.a.	n.a.	n.a.
189.53	5505.39	0.035	1.02082	2218.27	142.166	318.734	79.256	5.07941	11.388	15.6034	6.24135	4.81291	1.92516	64.1559	10.1796	11.1172	13.2061	64.2054	6.25294	23.5008	37.1708	8.15102	8.90253	4.51337	9.13903	6.79897	12.0602	105.365	n.a.	n.a.	n.a.	0.0887466	0.026624	n.a.	n.a.	0.387344	0.116203	93.9591	14.0939	74.6757	11.2014	117.426	17.6139	384.719	57.7079	n.a.	n.a.	n.a.	n.a.
193.59	5637.01	0.035	1.01198	955.132	n.a.	129.003	33.8302	n.a.	4.5692	n.a.	n.a.	n.a.	n.a.	50.5259	21.6088	29.9801	28.5269	134.501	28.2988	40.7155	39.2046	19.2539	15.5868	10.839	19.4946	5.56882	18.897	117.79	n.a.	n.a.	n.a.	0.173826	0.0521477	n.a.	n.a.	0.509453	0.152836	203.515	30.5273	109.948	16.4922	136.687	20.503	580.792	87.1188	n.a.	n.a.	n.a.	n.a.
198.68	5801.99	0.035	1.01126	1017.93	40.647	207.591	36.0287	1.43867	7.34753	25.0431	10.0172	4.1006	1.64024	310.298	21.6971	26.2241	79.3508	118.686	7.19379	30.556	33.1693	2.51632	2.70824	30.7911	5.55559	6.39667	12.7844	113.487	1.1	15.463	n.a.	0.0571482	0.0171444	0.933587	0.373435	0.479496	0.143849	156.436	23.4654	81.1372	12.1706	142.834	21.4251	817.978	122.697	n.a.	n.a.	n.a.	n.a.
203.76	5966.55	0.035	1.0138	1421.73	82.7248	311.053	50.4471	2.93531	11.037	17.1863	6.87452	3.6105	1.4442	n.a.	11.0544	62.2738	42.5328	91.406	7.86075	22.9237	41.3363	2.97353	6.88515	5.59153	n.a.	n.a.	12.2506	68.5771	1	3.23815	n.a.	0.0791882	0.0237565	0.764048	0.305619	0.356733	0.10702	122.19	18.3286	56.7865	8.51798	85.0658	12.7599	379.904	56.9856	n.a.	n.a.	n.a.	n.a.
207.75	6095.7	0.035	1.01527	1041.51	136.135	194.957	37.0094	4.83748	6.92767	7.65054	3.06022	3.14568	1.25827	145.639	11.8465	25.4884	29.6659	116.595	16.4844	21.9271	28.6597	8.44906	17.6495	6.87517	n.a.	n.a.	13.9383	97.991	n.a.	n.a.	n.a.	0.123869	0.0371608	n.a.	n.a.	0.433454	0.130036	155.006	23.251	61.6335	9.24502	111.929	16.7894	541.209	81.1813	0.00738082	0.0133848	n.a.	n.a.
212.75	6257.36	0.035	1.01578	1060.36	29.7623	349.81	37.6981	1.05812	12.4366	35.6276	14.251	2.79355	1.11742	191.596	11.6617	20.1	112.068	290.129	29.3316	129.268	98.6027	13.9246	28.4139	8.15881	1.82469	3.36115	39.6057	86.3558	n.a.	n.a.	n.a.	0.091816	0.0275448	n.a.	n.a.	0.567286	0.170186	448.728	67.3092	154.286	23.1429	125.962	18.8942	1064.4	159.66	n.a.	n.a.	n.a.	n.a.
216.75	6386.5	0.035	1.01563	984.88	24.8126	329.744	35.0096	0.882015	11.7214	39.6927	15.8771	2.77778	1.11111	237.554	11.5693	17.6	194.471	189.379	5.98015	124.496	101.941	10.4521	21.5414	21.3093	3.04307	8.71558	33.8941	103.169	n.a.	n.a.	n.a.	0.030611	0.00918331	n.a.	n.a.	0.549804	0.164941	319.855	47.9782	167.002	25.0503	137.064	20.5595	1085.11	162.767	n.a.	n.a.	n.a.	n.a.
222.75	6579.83	0.035	1.01841	1464.8	14.8187	856.626	52.2119	0.528204	30.534	98.8481	39.5392	1.68088	0.672354	25.6181	11.4769	15.105	153.671	79.5852	9.79291	23.6671	18.9686	2.15446	3.49672	8.82931	2.70653	4.14987	10.0619	112.85	1.63928	11.9894	n.a.	0.109567	0.0328702	0.879718	0.351887	0.5551	0.16653	113.045	16.9568	40.3055	6.04583	136.541	20.4811	495.763	74.3644	n.a.	n.a.	n.a.	n.a.
227.75	6740.53	0.035	1.01392	1036.31	20.733	235.04	36.7756	0.735756	8.3409	49.9834	19.9934	4.05167	1.62067	80.955	10.8	64.8978	92.5562	85.4336	3.07445	17.6022	16.4846	1.73829	1.80683	19.1615	n.a.	n.a.	10.1989	83.5172	n.a.	n.a.	n.a.	0.0347364	0.0104209	n.a.	n.a.	0.516393	0.154918	106.11	15.9165	39.1912	5.87868	93.7162	14.0574	488.227	73.234	n.a.	n.a.	n.a.	n.a.
232.75	6900.78	0.035	1.01638	1357.29	150.432	283.449	48.2834	5.35139	10.0833	9.02258	3.60903	3.12824	1.2513	136.292	10.4395	14.1933	31.4412	70.6189	22.7311	26.3441	17.5056	2.12586	1.41446	9.03659	2.05863	2.87041	8.75011	68.9752	1.1	9.42666	18.2058	0.243504	0.0730512	0.895503	0.358201	0.600781	0.180234	119.694	17.9541	35.0116	5.25174	106.458	15.9687	453.529	68.0294	n.a.	n.a.	n.a.	n.a.
237.75	7060.52	0.035	1.01384	1480.19	140.353	357.616	52.5237	4.98033	12.6898	10.5462	4.21849	2.97246	1.18898	34.9897	16.2345	14.1964	57.1907	84.6302	4.95824	35.6014	28.4155	2.47651	6.72749	11.9406	1.74021	7.58028	9.88805	101.132	3.46352	6.4747	2.83769	0.0553447	0.0166034	0.651495	0.260598	0.556125	0.166837	125.19	18.7785	58.8806	8.83209	123.796	18.5694	430.478	64.5717	n.a.	n.a.	n.a.	0.272671
243.75	7251.47	0.035	1.0226	944.888	67.6659	217.54	33.8186	2.42184	7.78601	13.964	5.58561	3.313	1.3252	63.7096	8.31224	14.3498	45.4219	124.619	6.8057	21.155	21.171	1.6551	3.37748	12.6782	3.39996	3.5641	9.98096	232.206	0.95	6.58956	3.05284	0.0517842	0.0155353	0.873998	0.349599	0.499811	0.149943	152.579	22.8869	45.8459	6.87688	252.78	37.9169	582.998	87.4497	n.a.	n.a.	n.a.	n.a.
247.75	7378.26	0.035	1.02103	1326.22	168.64	265.626	47.3937	6.02652	9.4924	7.86419	3.14568	3.05393	1.22157	144.518	8.90095	13.7502	32.2378	111.79	6.50302	26.9504	22.1357	1.85558	3.34548	13.1747	2.17272	1.77701	13.15	97.0475	0.98	17.9387	n.a.	0.0549736	0.0164921	0.948199	0.37928	0.549043	0.164713	145.244	21.7866	44.4612	6.66918	129.116	19.3674	518.229	77.7343	n.a.	n.a.	n.a.	n.a.
252.75	7536.12	0.035	1.01632	584.685	n.a.	58.2015	20.798	n.a.	2.0703	n.a.	n.a.	n.a.	n.a.	24.0962	6.42013	8.39693	20.1499	55.969	5.76791	20.1784	17.5433	3.2505	5.59246	1.35503	0.545194	1.74656	10.1242	68.8276	0.883882	4.46284	n.a.	0.0934272	0.0280282	0.834687	0.333875	0.534929	0.160479	81.9154	12.2873	30.033	4.50495	84.2985	12.6448	255.31	38.2965	n.a.	n.a.	n.a.	0.0754413
257.75	7693.24	0.035	1.01704	1388.58	49.3839	264.746	49.4286	1.75789	9.42403	28.1181	11.2472	4.4204	1.76816	110.28	8.50026	10.6386	20.3233	72.0654	9.83288	20.9879	20.3335	3.30489	1.49501	2.62524	n.a.	5.18852	13.3064	49.7683	n.a.	5.30623	n.a.	0.120062	0.0360186	n.a.	n.a.	0.507919	0.152376	102.886	15.4329	32.9471	4.94207	68.3809	10.2571	353.957	53.0935	n.a.	n.a.	n.a.	n.a.
263.25	7865.13	0.035	1.01621	2267.15	113.539	474.804	80.6369	4.03829	16.8876	19.9681	7.98723	3.85345	1.54138	25.2151	10.7252	98.9259	20.5047	51.1148	5.68949	17.6847	18.5685	2.80489	3.01579	6.31748	n.a.	n.a.	9.68777	36.163	n.a.	n.a.	n.a.	0.10016	0.0300479	n.a.	n.a.	0.487811	0.146343	74.489	11.1733	30.7066	4.60599	45.8508	6.87762	306.417	45.9626	n.a.	n.a.	n.a.	0.0672849
268.25	8020.47	0.035	1.02664	3053.79	182.047	896.923	109.73	6.54135	32.2285	16.7748	6.7099	2.83028	1.13211	22.3	10.8943	91.4414	54.7986	63.9028	11.0411	15.7356	21.9527	2.30489	3.36344	6.09261	n.a.	n.a.	9.88543	42.8765	n.a.	n.a.	n.a.	0.147325	0.0441975	n.a.	n.a.	0.417519	0.125256	90.6795	13.6019	33.7137	5.05705	52.762	7.91429	356.589	53.4884	n.a.	n.a.	n.a.	0.0496066
277.25	8297.68	0.035	1.01935	2446.12	167.542	821.854	87.2708	5.97743	29.3214	14.6001	5.84003	2.47234	0.988936	18.7526	7.21214	52.0509	35.7289	56.7761	9.8342	9.90403	17.0379	1.80489	3.56679	4.32045	n.a.	n.a.	10.9657	32.0061	n.a.	n.a.	n.a.	0.147638	0.0442914	n.a.	n.a.	0.367607	0.110282	76.5144	11.4772	26.73	4.0095	42.9718	6.44577	259.961	38.9941	n.a.	n.a.	n.a.	0.0873092
282.75	8465.43	0.035	1.01856	3432.6	254.792	1017.55	122.371	9.08321	36.2752	13.4722	5.38888	2.69786	1.07915	102.096	6.65897	9.22959	19.3595	70.8908	13.7096	18.7605	15.2361	1.49139	3.77013	5.96405	9.04242	8.56924	9.13054	50.2189	4.31268	5.53216	3.88271	0.162051	0.0486153	0.561935	0.224774	0.551834	0.16555	103.361	15.5041	44.0733	6.611	73.077	10.9615	357.855	53.6782	n.a.	n.a.	n.a.	0.120426
287.25	8601.68	0.035	1.02268	6496.6	381.218	1548.01	232.539	13.6453	55.4095	17.0417	6.81667	3.36745	1.34698	59.8455	5.39768	63.5418	16.9183	62.6342	16.734	21.3805	12.2113	3.73394	3.97238	4.85192	n.a.	n.a.	8.60777	121.872	1.95605	2.02078	n.a.	0.21084	0.063252	0.508138	0.203255	0.63648	0.190944	100.749	15.1123	24.7695	3.71543	134.457	20.1685	405.678	60.8517	0.0134699	0.0426123	n.a.	n.a.
292.75	8766.92	0.035	1.01862	1869.13	258.754	504.679	66.6378	9.22505	17.9927	7.22357	2.88943	2.44832	0.979328	154.884	10.7449	15.6602	45.8002	129.738	12.888	40.5629	41.6956	4.75774	8.78178	4.65391	n.a.	n.a.	13.8533	38.3828	0.999174	7.41826	n.a.	0.0903616	0.0271085	0.881297	0.352519	0.493115	0.147934	183.189	27.4784	59.8891	8.98336	60.6536	9.09804	530.822	79.6233	n.a.	n.a.	n.a.	0.331928
299.07	8954.94	0.035	1.01712	1738.41	232.193	495.645	61.8857	8.26586	17.6445	7.4869	2.99476	2.38845	0.955382	27.7977	4.28409	8.19483	35.2632	91.3328	7.89031	20.0011	18.2932	2.27404	4.49958	5.23076	n.a.	n.a.	7.97752	39.7	n.a.	2.90992	n.a.	0.0795209	0.0238563	n.a.	n.a.	0.5223	0.15669	119.224	17.8836	30.2976	4.54463	50.5875	7.58812	275.649	41.3474	n.a.	n.a.	n.a.	n.a.
303.13	9074.62	0.035	1.02247	1942.3	254.992	451.694	69.5081	9.12529	16.1646	7.61709	3.04684	2.74846	1.09938	32.2	7.28407	10.4303	20.7812	56.4285	10.1508	34.0706	27.8813	3.78028	8.83715	6.795	n.a.	n.a.	11.5972	47.6484	0.981518	5.18927	n.a.	0.152461	0.0457384	0.840941	0.336376	0.549952	0.164986	100.65	15.0975	47.2938	7.09407	65.4163	9.81245	284.056	42.6083	n.a.	n.a.	n.a.	0.172332
308.2	9222.8	0.035	1.02009	2647.88	321.391	615.747	94.5381	11.4747	21.9842	8.23882	3.29553	2.8255	1.1302	82.3692	6.00961	7.1894	20.533	65.7361	8.93096	19.6194	18.6998	3.24418	6.21634	3.06658	0.378018	1.95577	12.3547	46.509	n.a.	5.5598	n.a.	0.11961	0.0358831	n.a.	n.a.	0.511999	0.1536	94.2865	14.143	33.5607	5.0341	64.4235	9.66353	308.372	46.2558	n.a.	n.a.	n.a.	n.a.
313.27	9369.52	0.035	1.01643	1875.91	303.116	422.984	66.7358	10.7834	15.0477	6.18877	2.47551	2.58355	1.03342	62.9388	7.08573	9.4164	23.3585	88.6816	7.1605	18.8294	19.4711	1.62709	1.78218	16.5218	2.35292	2.05709	9.21124	118.026	7.80807	17.2284	28.2519	0.0747114	0.0224134	0.688133	0.275253	0.491623	0.147487	114.672	17.2007	43.8122	6.57183	180.526	27.0788	441.809	66.2713	n.a.	n.a.	n.a.	0.0690921
318.34	9514.7	0.035	1.01958	1867.05	356.936	616.787	66.6258	12.7373	22.0101	5.23077	2.09231	1.91743	0.766972	89.6848	5.2297	7.33274	17.0285	57.602	5.97918	19.0698	18.5991	2.61988	1.67047	4.06131	0.211647	1.63266	9.84356	54.6105	n.a.	3.38178	n.a.	0.0940401	0.028212	n.a.	n.a.	0.506247	0.151874	82.6509	12.3976	28.7951	4.31926	67.8359	10.1754	298.558	44.7836	n.a.	n.a.	n.a.	0.0729353
323.41	9658.29	0.035	1.02017	2146.8	61.9372	435.865	76.6533	2.21152	15.5629	34.661	13.8644	4.31256	1.72503	74.2958	6.8	116.252	15.9	96.8707	7.52701	27.4239	21.0192	2.58189	1.73513	10.7686	n.a.	5.37626	12.1741	52.5559	n.a.	4.3746	n.a.	0.0720994	0.0216298	n.a.	n.a.	0.566106	0.169832	131.822	19.7732	41.4811	6.22216	69.1046	10.3657	455.655	68.3483	n.a.	n.a.	n.a.	0.204248
328.48	9800.22	0.035	1.02596	3940.66	305.663	958.648	141.504	10.9759	34.4237	12.8922	5.15687	3.11685	1.24674	58.9068	4.23564	4.76288	14.3514	48.6433	4.53746	14.6652	13.0951	1.2094	1.0905	13.8958	n.a.	n.a.	8.79338	83.8173	1	4.1424	n.a.	0.0853216	0.0255965	0.805538	0.322215	0.52828	0.158484	67.846	10.1769	29.2908	4.39362	97.753	14.663	277.147	41.572	n.a.	n.a.	n.a.	0.0933621
333.55	9940.42	0.035	1.02721	5637.19	230.812	867.176	202.67	8.29821	31.1769	24.4233	9.76931	5.13411	2.05364	139.632	6.33837	7.57481	15.2856	75.4508	4.84912	14.0492	15.2974	0.866373	1.09374	12.9989	1.8872	1.71447	7.14031	105.97	1	24.3883	n.a.	0.0603876	0.0181163	0.960612	0.384245	0.478734	0.14362	94.3491	14.1524	33.858	5.07871	138.499	20.7748	435.536	65.3304	n.a.	n.a.	n.a.	0.0985774
338.62	10078.8	0.035	1.03081	5753.67	157.71	761.791	207.583	5.68992	27.4842	36.4827	14.5931	6.25739	2.50295	32.6597	5.89696	20.0941	12.2922	61.7933	6.25085	17.2358	22.1609	5.93053	5.47835	2.47486	n.a.	n.a.	13.7845	157.398	1	9.98663	n.a.	0.0918647	0.0275594	0.90898	0.363592	0.437493	0.131248	85.2799	12.792	36.0446	5.40669	182.169	27.3254	374.437	56.1655	n.a.	n.a.	n.a.	n.a.
345.1	10253	0.035	1.0254	3817.46	227.802	670.567	137.004	8.17558	24.0659	16.7578	6.7031	4.24932	1.69973	50.5956	6.13532	15.4234	8.53768	50.1455	5.26052	14.8901	16.5158	6.80678	5.23619	4.1189	n.a.	n.a.	11.8554	145.408	n.a.	n.a.	n.a.	0.0949448	0.0284835	n.a.	n.a.	0.474118	0.142235	70.2962	10.5444	32.6777	4.90166	157.263	23.5895	340.929	51.1393	n.a.	n.a.	n.a.	n.a.
348.76	10350.1	0.035	1.02713	2953.8	992.667	785.371	106.188	35.6861	28.2339	2.97563	1.19025	1.66127	0.664509	55.9779	6.43708	10.1204	49.5568	66.8559	6.55744	17.9133	18.1592	1.52729	4.30475	3.21312	0.197991	1.5477	6.69011	188.157	n.a.	4.57573	n.a.	0.0893222	0.0267966	n.a.	n.a.	0.496592	0.148978	91.3266	13.699	28.9501	4.34251	199.423	29.9134	441.792	66.2688	n.a.	n.a.	n.a.	0.273177
353.83	10482.7	0.035	1.03192	5737.45	674.811	1721.93	207.221	24.3724	62.1917	8.50231	3.40092	2.39385	0.95754	197.202	6.65	9.8	167.012	63.2484	9.17293	28.8622	29.7028	1.00778	4.67868	11.124	n.a.	n.a.	6.27891	47.9577	1	1.22211	n.a.	0.126661	0.0379982	0.549976	0.219991	0.492824	0.147847	101.284	15.1925	46.5132	6.97699	56.4587	8.4688	584.919	87.7379	n.a.	n.a.	n.a.	n.a.
359.91	10639.1	0.035	1.03255	1889.71	763.251	617.376	68.293	27.5834	22.3116	2.47587	0.990349	1.36873	0.547494	21.4777	6.90454	8.17066	33.9832	69.5383	8.46156	19.2315	19.7422	4.0739	7.63859	2.4597	n.a.	n.a.	10.7016	93.9261	1.12965	5.04285	n.a.	0.108482	0.0325445	0.816986	0.326794	0.493448	0.148034	97.2313	14.5847	33.9144	5.08716	110.8	16.62	312.482	46.8723	n.a.	n.a.	n.a.	0.0675301
365.49	10725.2	0.035	1.03598	2615.47	190.826	465.52	94.8351	6.91921	16.8794	13.7061	5.48242	3.9849	1.59396	54.3288	5.74722	6.7048	34.0995	62.6268	5.87062	20.7205	18.5191	5.20159	7.54852	2.82044	n.a.	n.a.	8.47124	73.4985	1.16888	4.26405	n.a.	0.0857057	0.0257117	0.784853	0.313941	0.528051	0.158415	89.2179	13.3827	34.0897	5.11345	87.4027	13.1104	311.591	46.7386	n.a.	n.a.	n.a.	n.a.
369.04	10736	0.035	1.0383	3086.4	515.624	802.324	112.161	18.738	29.1568	5.98576	2.3943	2.34182	0.936729	79.0842	3.68891	4.4207	36.4245	46.0912	6.14052	12.1382	10.9266	2.50094	5.8359	1.09981	n.a.	n.a.	5.38023	99.4756	n.a.	3.0716	n.a.	0.117563	0.0352689	n.a.	n.a.	0.526266	0.15788	64.37	9.65549	20.3632	3.05449	107.927	16.1891	316.279	47.4418	n.a.	n.a.	n.a.	n.a.
373.6	10749.8	0.035	1.0546	3234.23	814.134	828.343	119.378	30.0504	30.5748	3.9726	1.58904	1.96912	0.787647	103.84	4.24368	7.11191	31.6564	62.6242	4.25468	16.8038	17.7377	2.63128	5.66951	1.18579	n.a.	n.a.	5.22166	149.393	0.879907	5.30895	n.a.	0.0636177	0.0190853	0.857824	0.34313	0.48648	0.145944	83.6826	12.5524	27.2243	4.08365	160.804	24.1206	418.562	62.7843	n.a.	0.00831766	n.a.	n.a.
379.68	10768.3	0.035	1.05285	404.945	n.a.	17.3949	14.9222	n.a.	0.641001	n.a.	n.a.	n.a.	n.a.	24.0624	2.32325	4.68056	25.997	65.9604	5.08804	12.6014	14.7806	1.65761	3.56525	1.71957	0.373453	1.58374	4.43304	99.8876	n.a.	1.53972	n.a.	0.0716136	0.0214841	n.a.	n.a.	0.460208	0.138062	83.6499	12.5475	23.6802	3.55203	105.86	15.8791	270.254	40.538	n.a.	n.a.	n.a.	0.21101
384.94	10784.3	0.329	1.08409	1582.19	345.116	443.83	564.313	123.091	158.299	4.58451	1.8338	2.00544	0.802177	40.8613	2.05881	3.43131	9.54512	26.79	2.25072	6.90485	6.21213	1.56649	2.96513	0.787408	n.a.	n.a.	4.48641	23.6403	n.a.	1.95286	n.a.	0.0775022	0.0232507	n.a.	n.a.	0.526406	0.157922	35.9456	5.39184	11.5312	1.72967	30.0795	4.51193	133.453	20.0179	n.a.	0.119442	n.a.	n.a.
390.06	10799.8	0.329	1.06347	2035.27	35.5669	296.139	712.105	12.4442	103.614	57.2237	22.8895	6.13575	2.4543	54.0923	6.28999	10.4535	24.4834	43.8011	5.28323	12.3541	15.8713	1.02958	1.28237	3.95528	3.02298	0.286956	4.83048	107.86	1	4.68772	n.a.	0.107636	0.0322907	0.824183	0.329673	0.437693	0.131308	61.4384	9.21576	25.4485	3.81727	118.378	17.7568	300.585	45.0877	n.a.	n.a.	n.a.	n.a.
395.17	10815.4	0.329	1.06822	113.38	175.47	39.2857	39.8468	61.668	13.8067	0.646151	0.25846	0.527949	0.21118	67.3233	4.09052	6.18573	10.8522	40.9859	2.64003	10.8015	9.55564	0.666254	0.83579	3.4959	0.308805	n.a.	4.35577	75.599	n.a.	1.54761	n.a.	0.0605152	0.0181546	n.a.	n.a.	0.5306	0.15918	54.4274	8.1641	14.8624	2.22936	81.5024	12.2254	239.244	35.8866	n.a.	n.a.	n.a.	n.a.
406.43	10849.5	0.329	1.05814	1460.05	38.3627	495.442	508.285	13.3552	172.477	38.0591	15.2236	2.73518	1.09407	206.565	10.0332	11.8127	17.0895	73.0389	4.54883	22.1882	22.796	1.81568	5.80948	4.95606	0.287249	n.a.	9.6352	61.9739	3.34611	28.4699	n.a.	0.0586282	0.0175885	0.894829	0.357932	0.493245	0.147973	99.776	14.9664	35.6645	5.34967	103.425	15.5138	484.366	72.6548	n.a.	n.a.	n.a.	n.a.
415.64	10877.5	0.329	1.06931	3915.81	463.207	1360.79	1377.6	162.958	478.732	8.45369	3.38148	2.14683	0.858732	113.319	6	12.1	41.2876	29.981	3.45815	13.3511	8.33874	1.75756	2.14358	2.41938	0.880139	1.11557	4.21983	48.341	n.a.	n.a.	n.a.	0.103416	0.0310249	n.a.	n.a.	0.615546	0.184664	46.7902	7.01853	16.655	2.49825	52.5608	7.88412	288.713	43.3069	0.0131017	0.0288422	n.a.	n.a.
425.87	10908.6	0.329	1.13769	1245.25	144.642	299.855	466.096	54.1397	112.236	8.60914	3.44366	2.80147	1.12059	20.0734	2.53349	12.4	10.0345	24.2965	3.25673	10.1899	12.1053	0.28072	1.42317	5.70838	n.a.	n.a.	2.95183	16.5085	n.a.	0.805828	n.a.	0.118198	0.0354593	n.a.	n.a.	0.457044	0.137113	37.7431	5.66147	19.5176	2.92764	20.2662	3.03993	122.568	18.3853	0.00748967	0.0530763	n.a.	n.a.
435.29	10937.2	0.329	1.07744	7277.68	297.717	1500.41	2579.78	105.534	531.863	24.445	9.77799	4.04736	1.61894	19.5584	3.47176	12.5707	24.882	53.594	16.8452	7.02872	15.8719	2.45711	5.17955	1.29237	0.190525	0.654369	6.32	115.286	n.a.	1.68558	n.a.	0.239145	0.0717436	n.a.	n.a.	0.306923	0.0920768	77.468	11.6202	25.6458	3.84687	123.292	18.4937	286.888	43.0332	n.a.	n.a.	n.a.	n.a.
[truncated: 32 more columns]
