# Supplementary material for: Fire, vegetation, and Holocene climate in a southeastern Tibetan lake: a multi-biomarker reconstruction from Paru Co
Source: Copernicus journal article supplement (doi:10.5194/cp-14-1543-2018), 2018-10-23
Supplement: Supplementary file 1 [file Supplementary Information (1).docx]

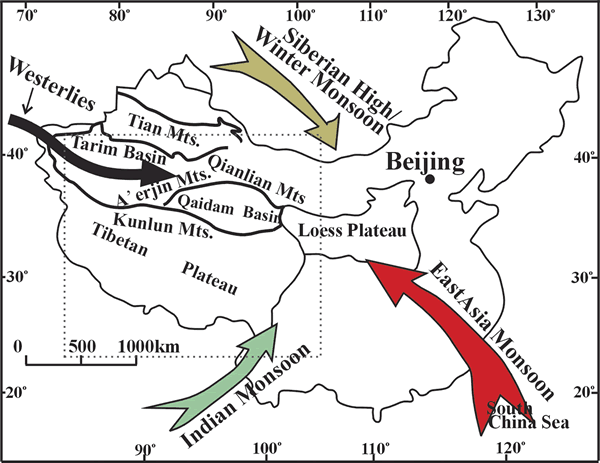


S1: Major climatic systems acting on the Tibetan Plateau. Image source: Dong et al., 2010.


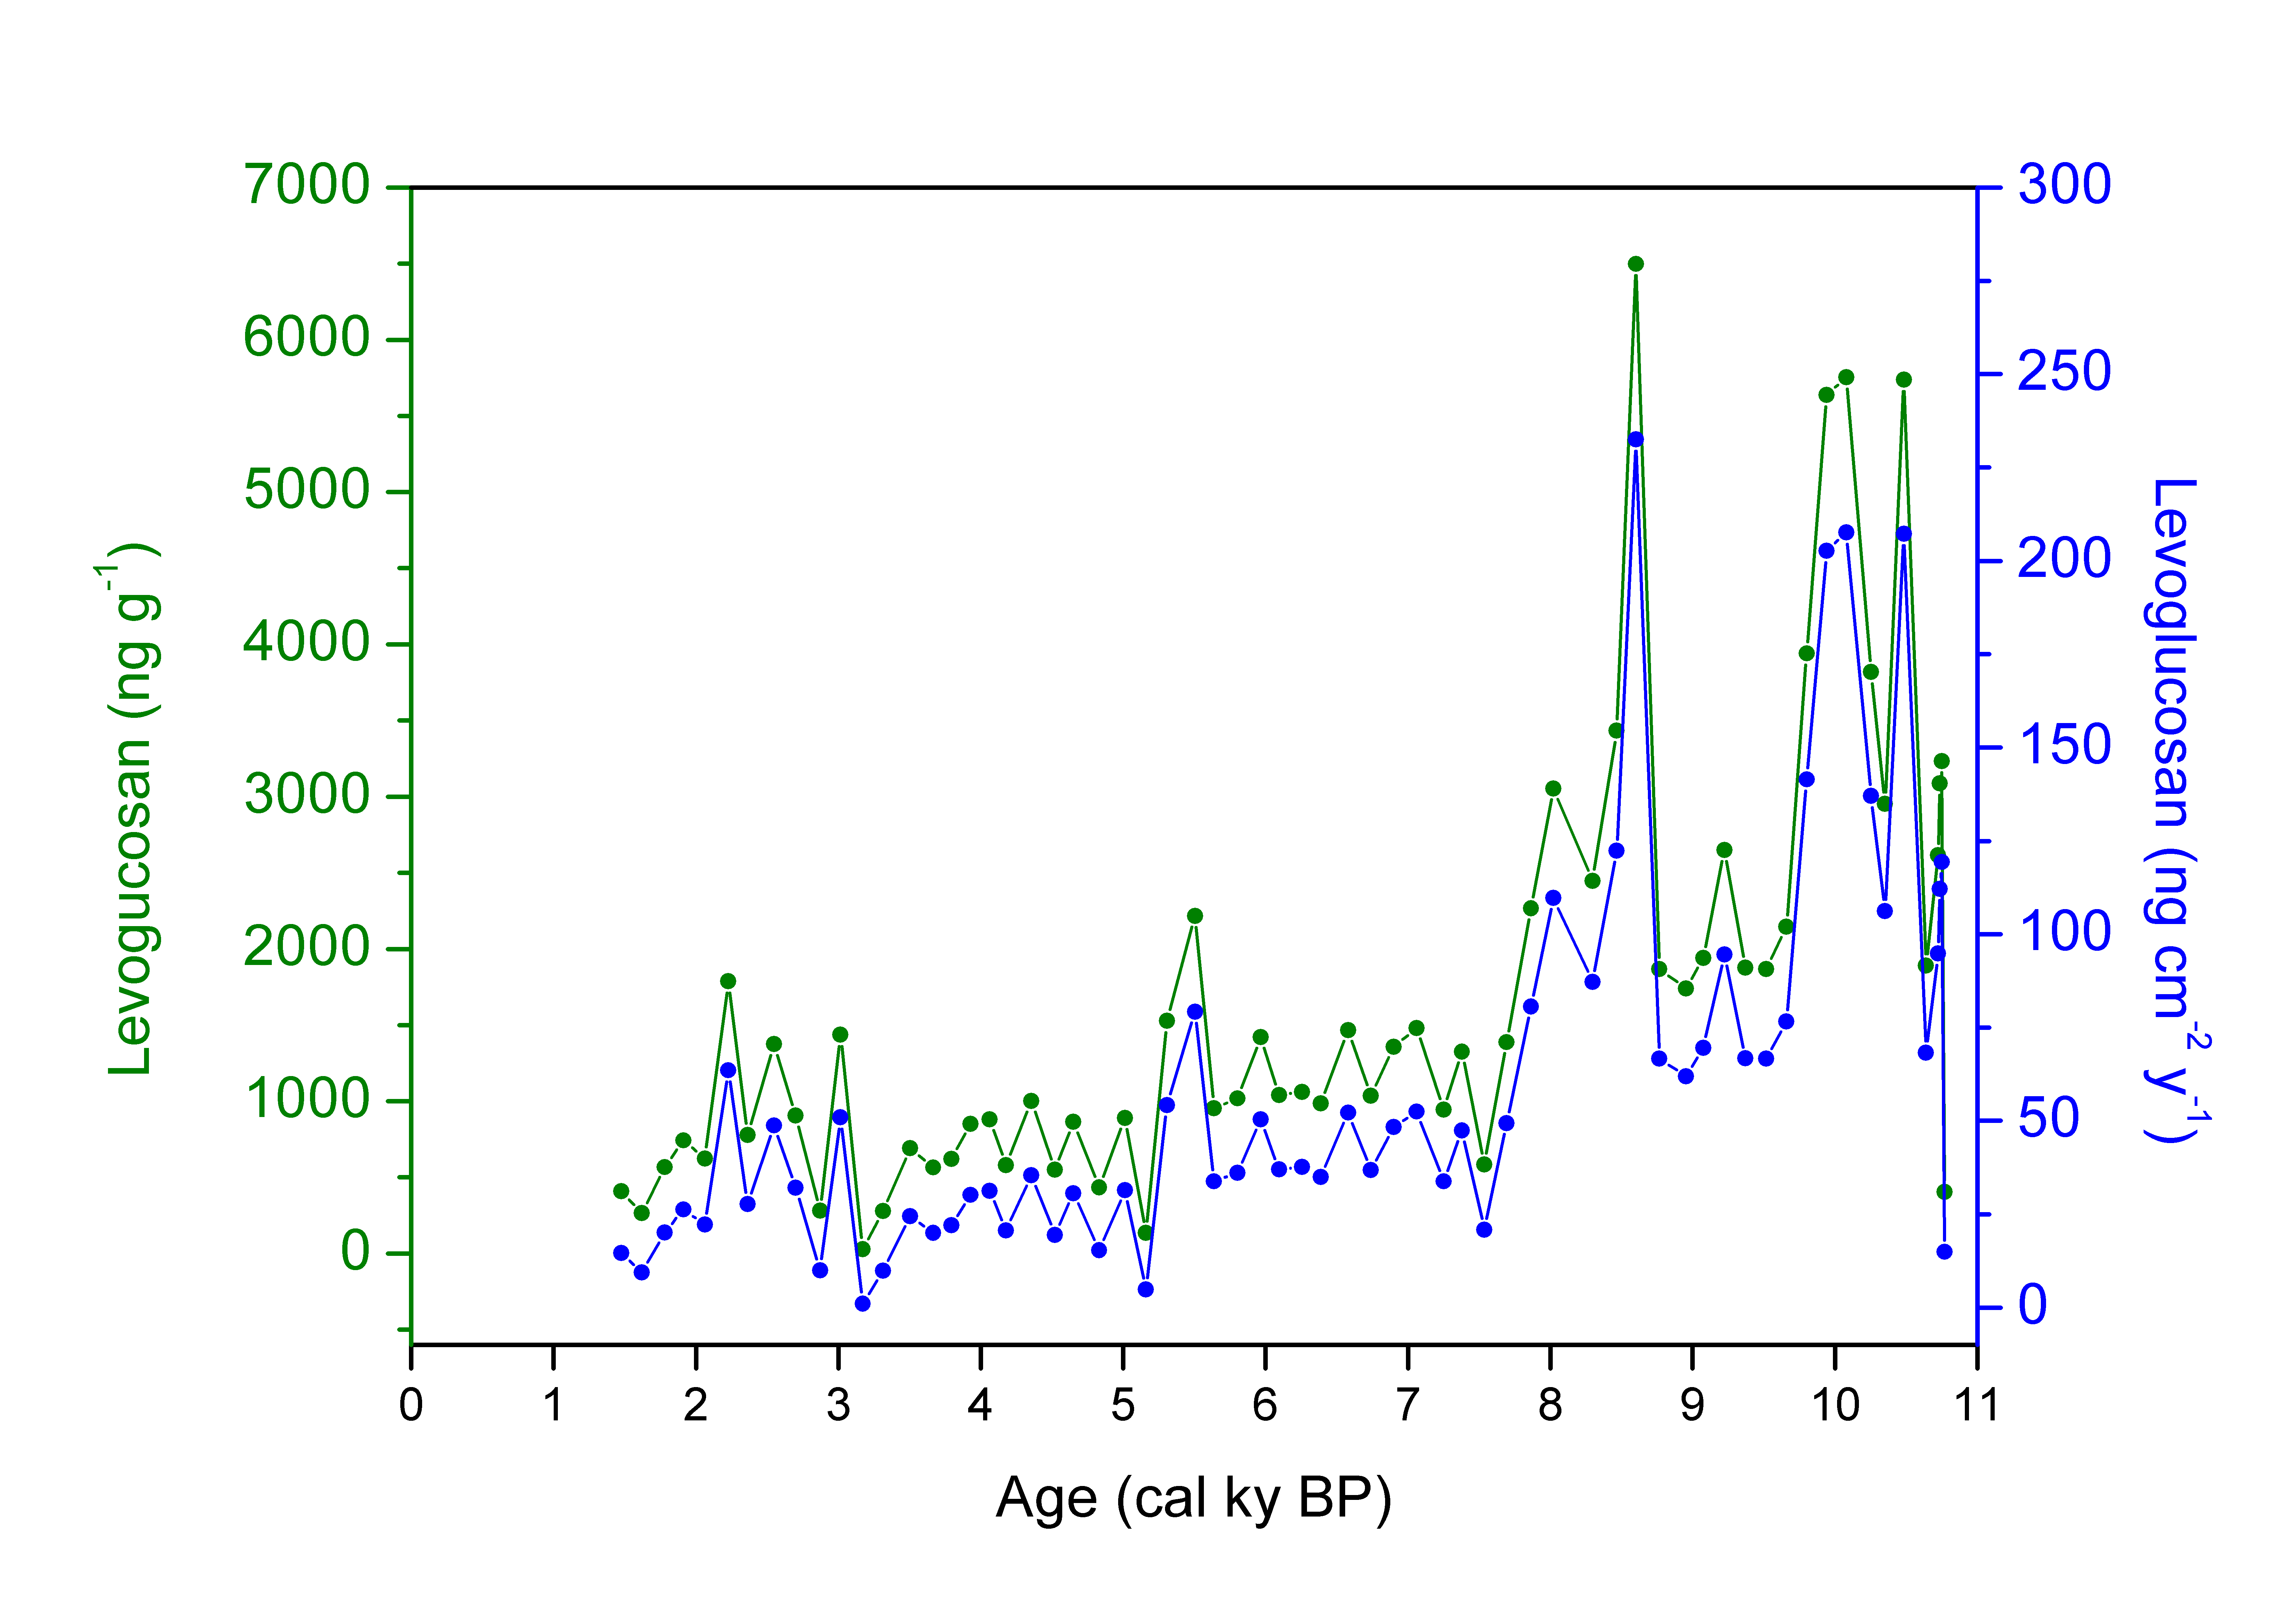


S2: Comparison between levoglucosan results expressed in concentrations (ng g-1) and fluxes (ng cm-2 y-1).


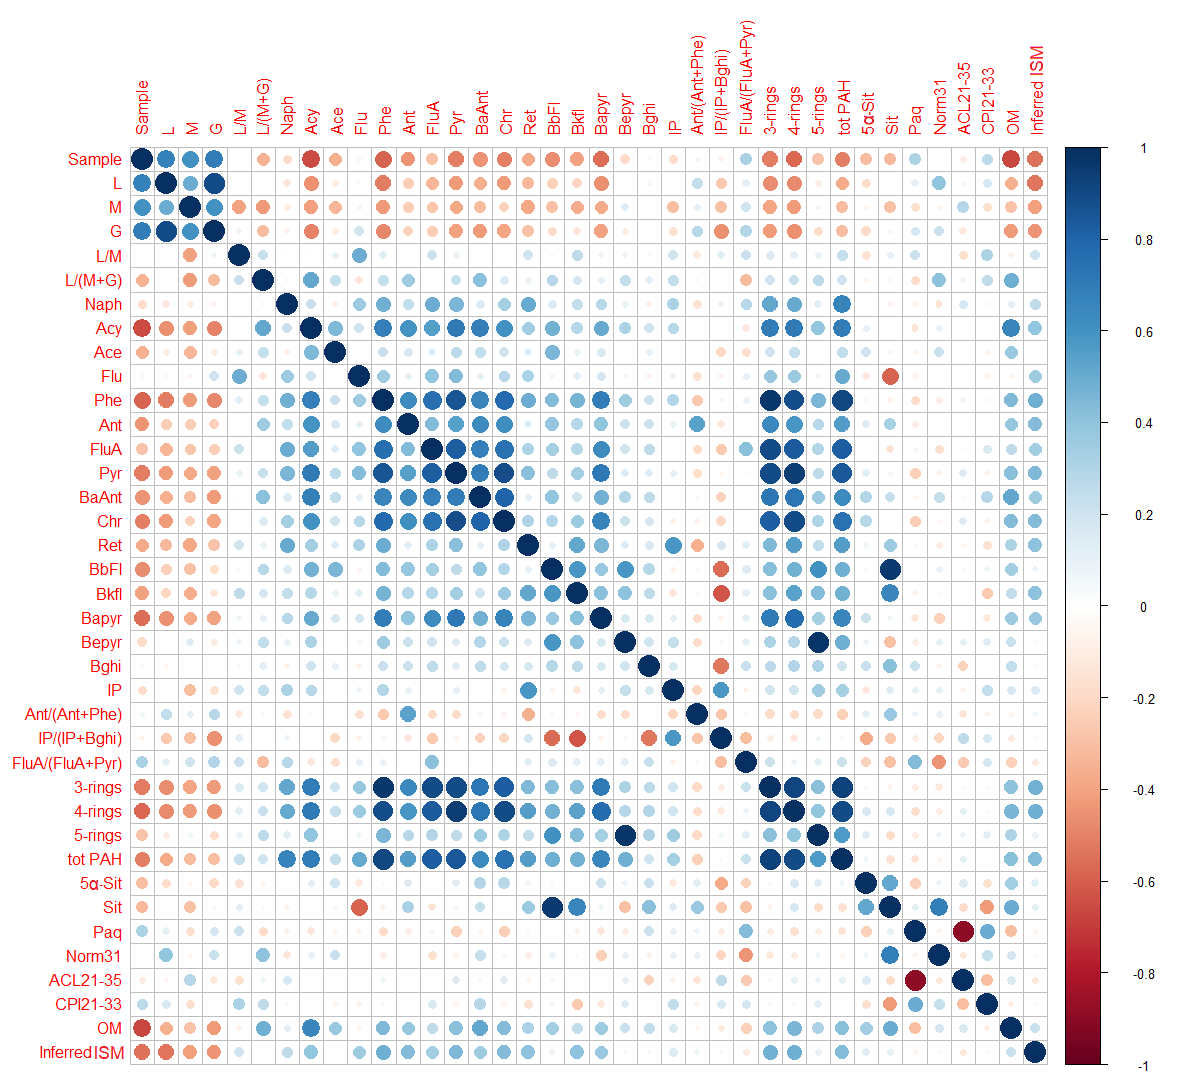


S3: Pearson’s correlation chart for Paru Co between 10.768 and 1.347 cal ky BP.


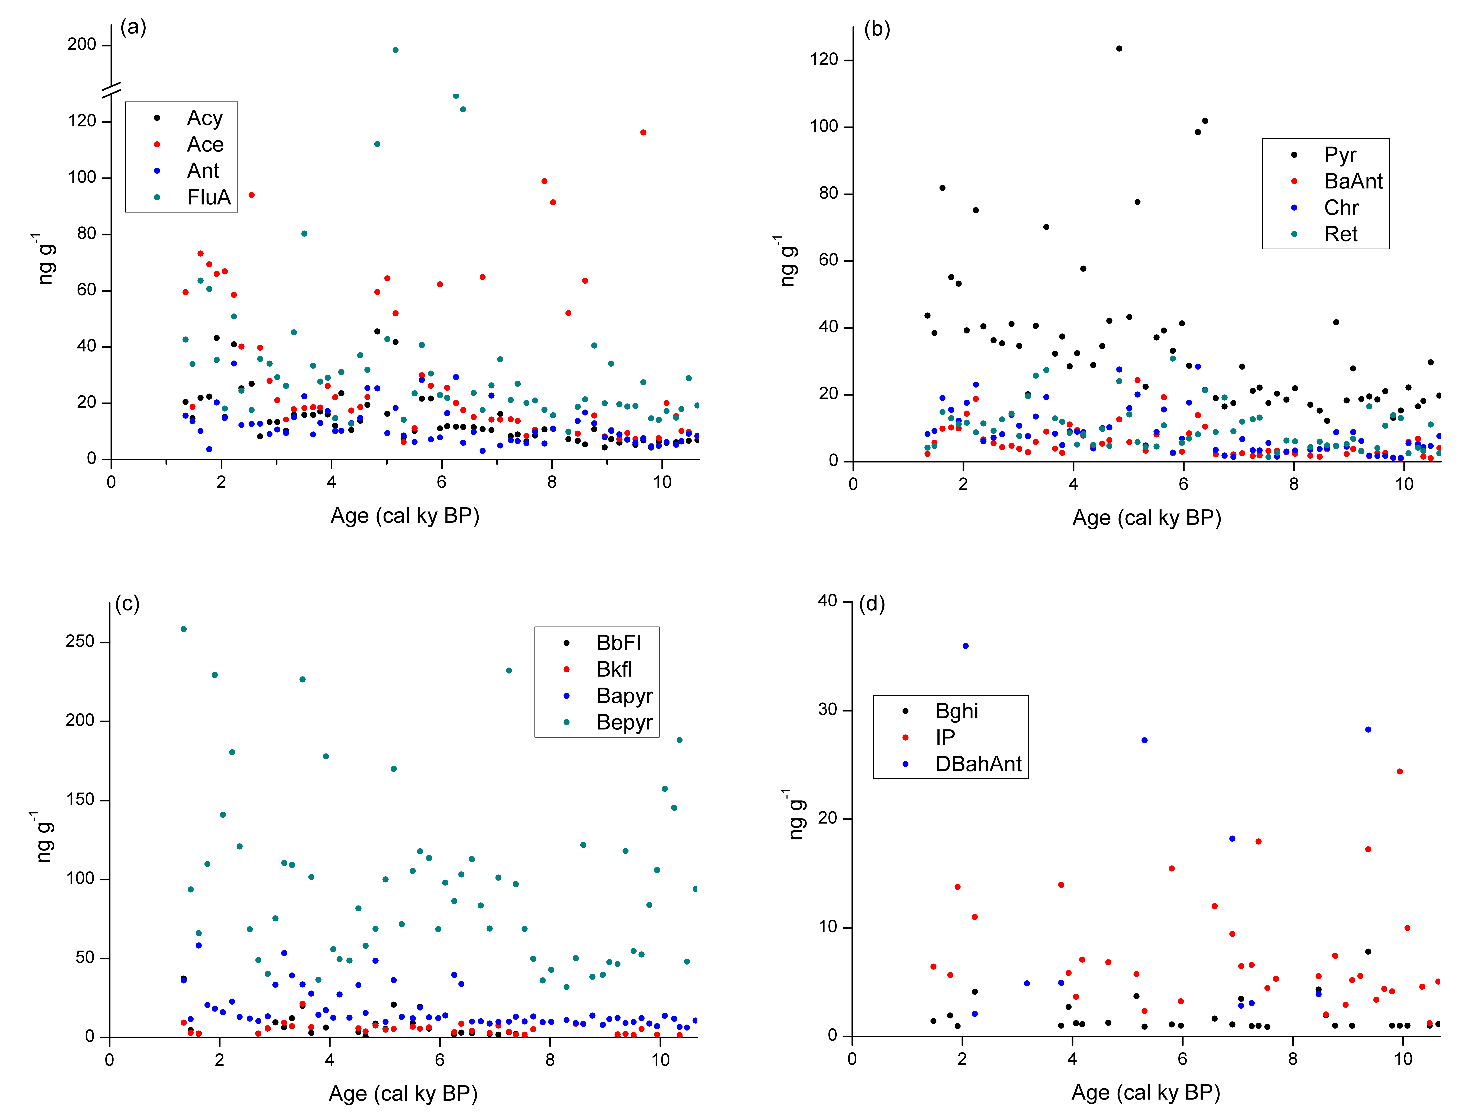


S4: Single PAHs concentrations.


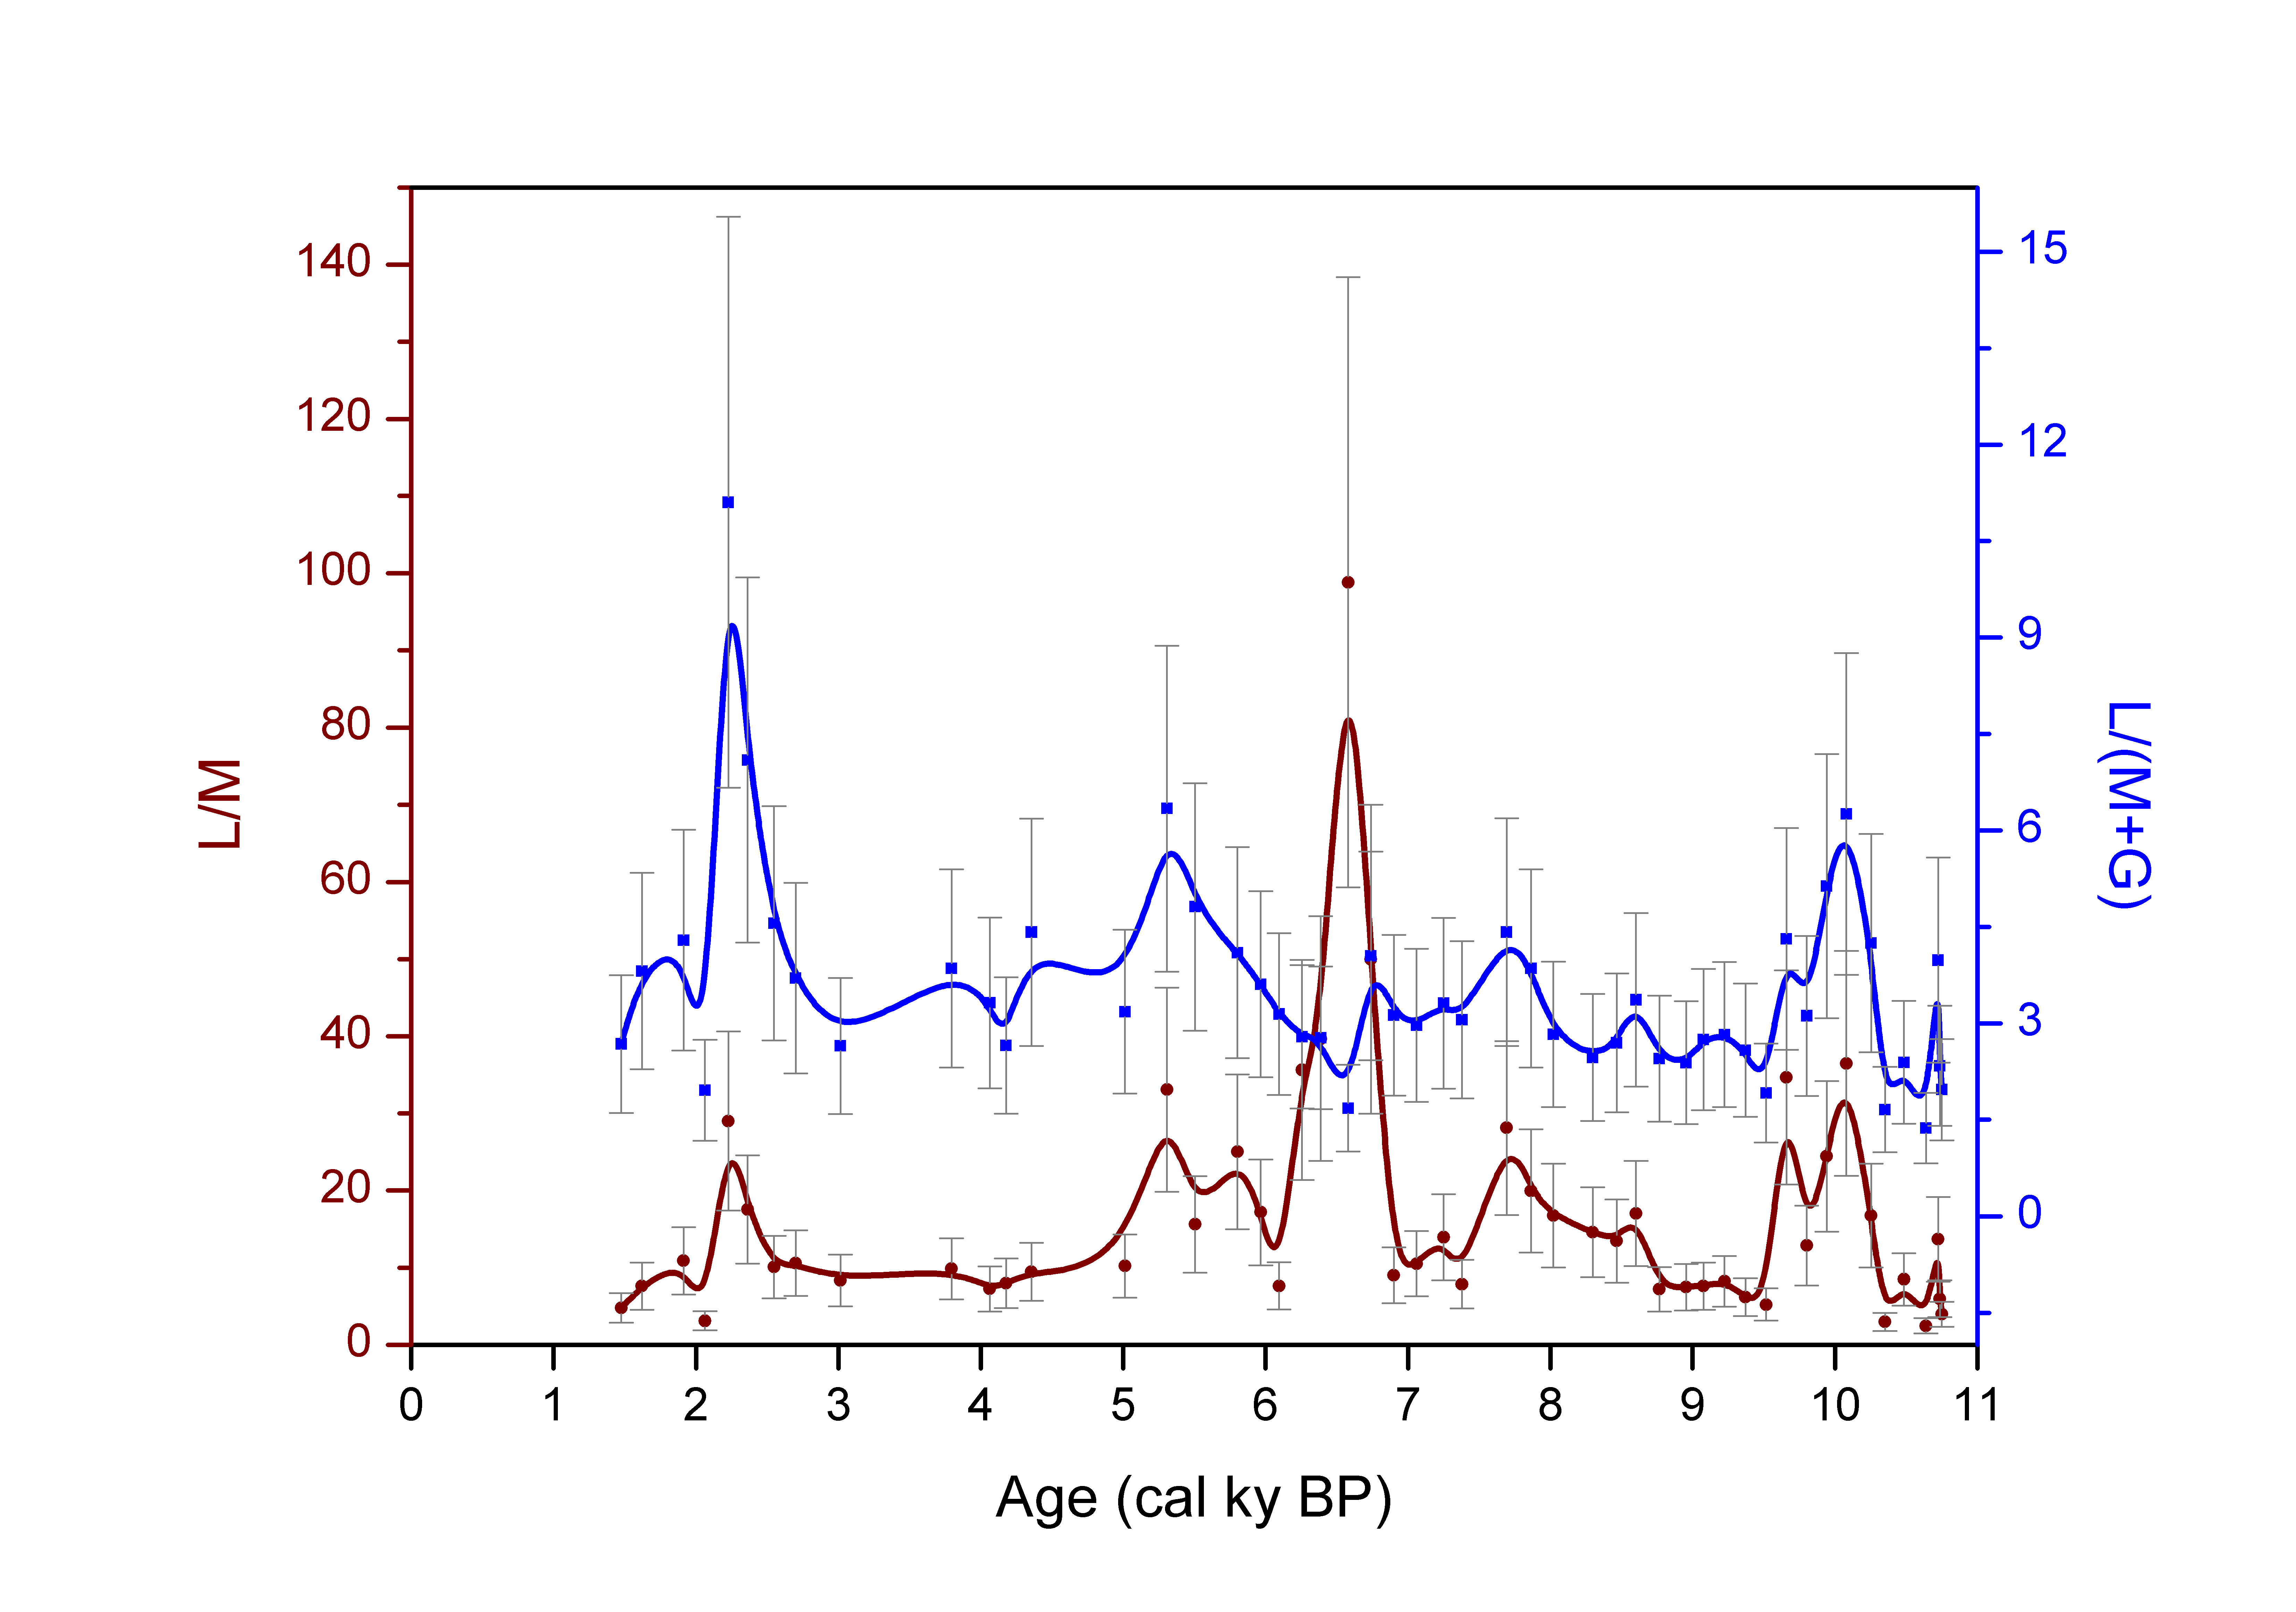


S5: L/M and L/(M+G) ratios. Data points with absolute error bars and B-spline interpolation.


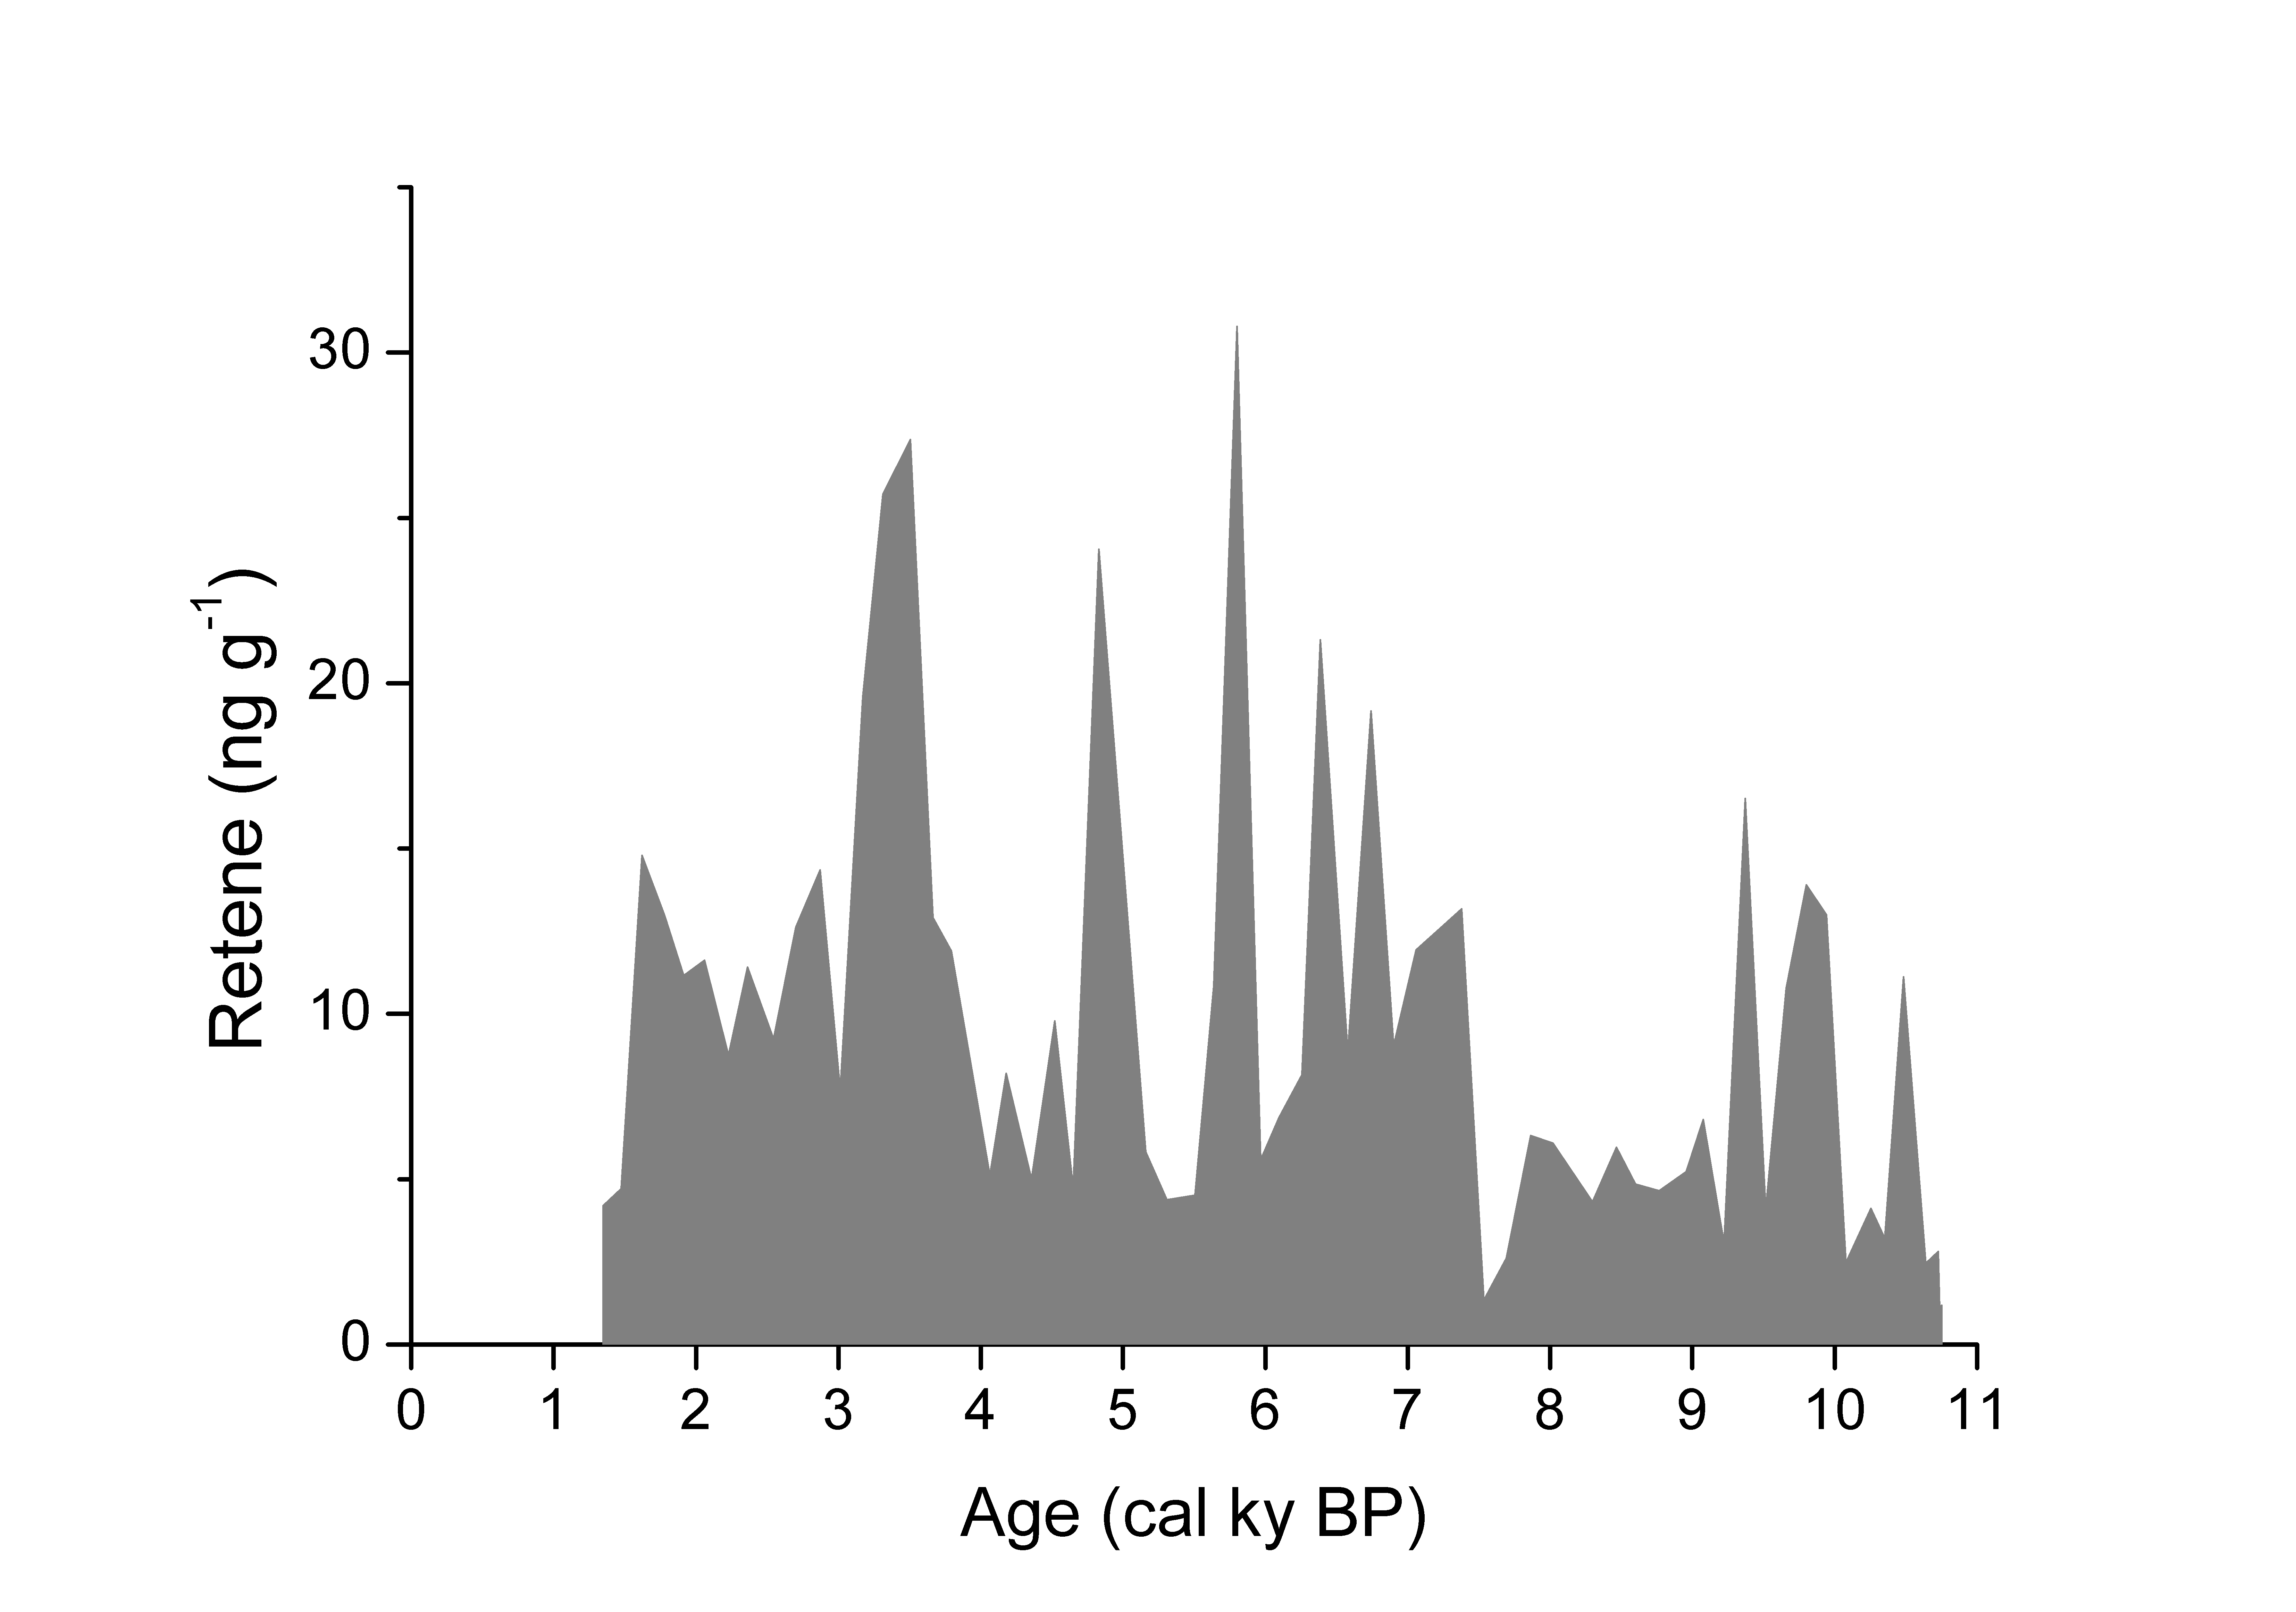


S6: Retene’s concentrations in Paru Co sediment core B11.


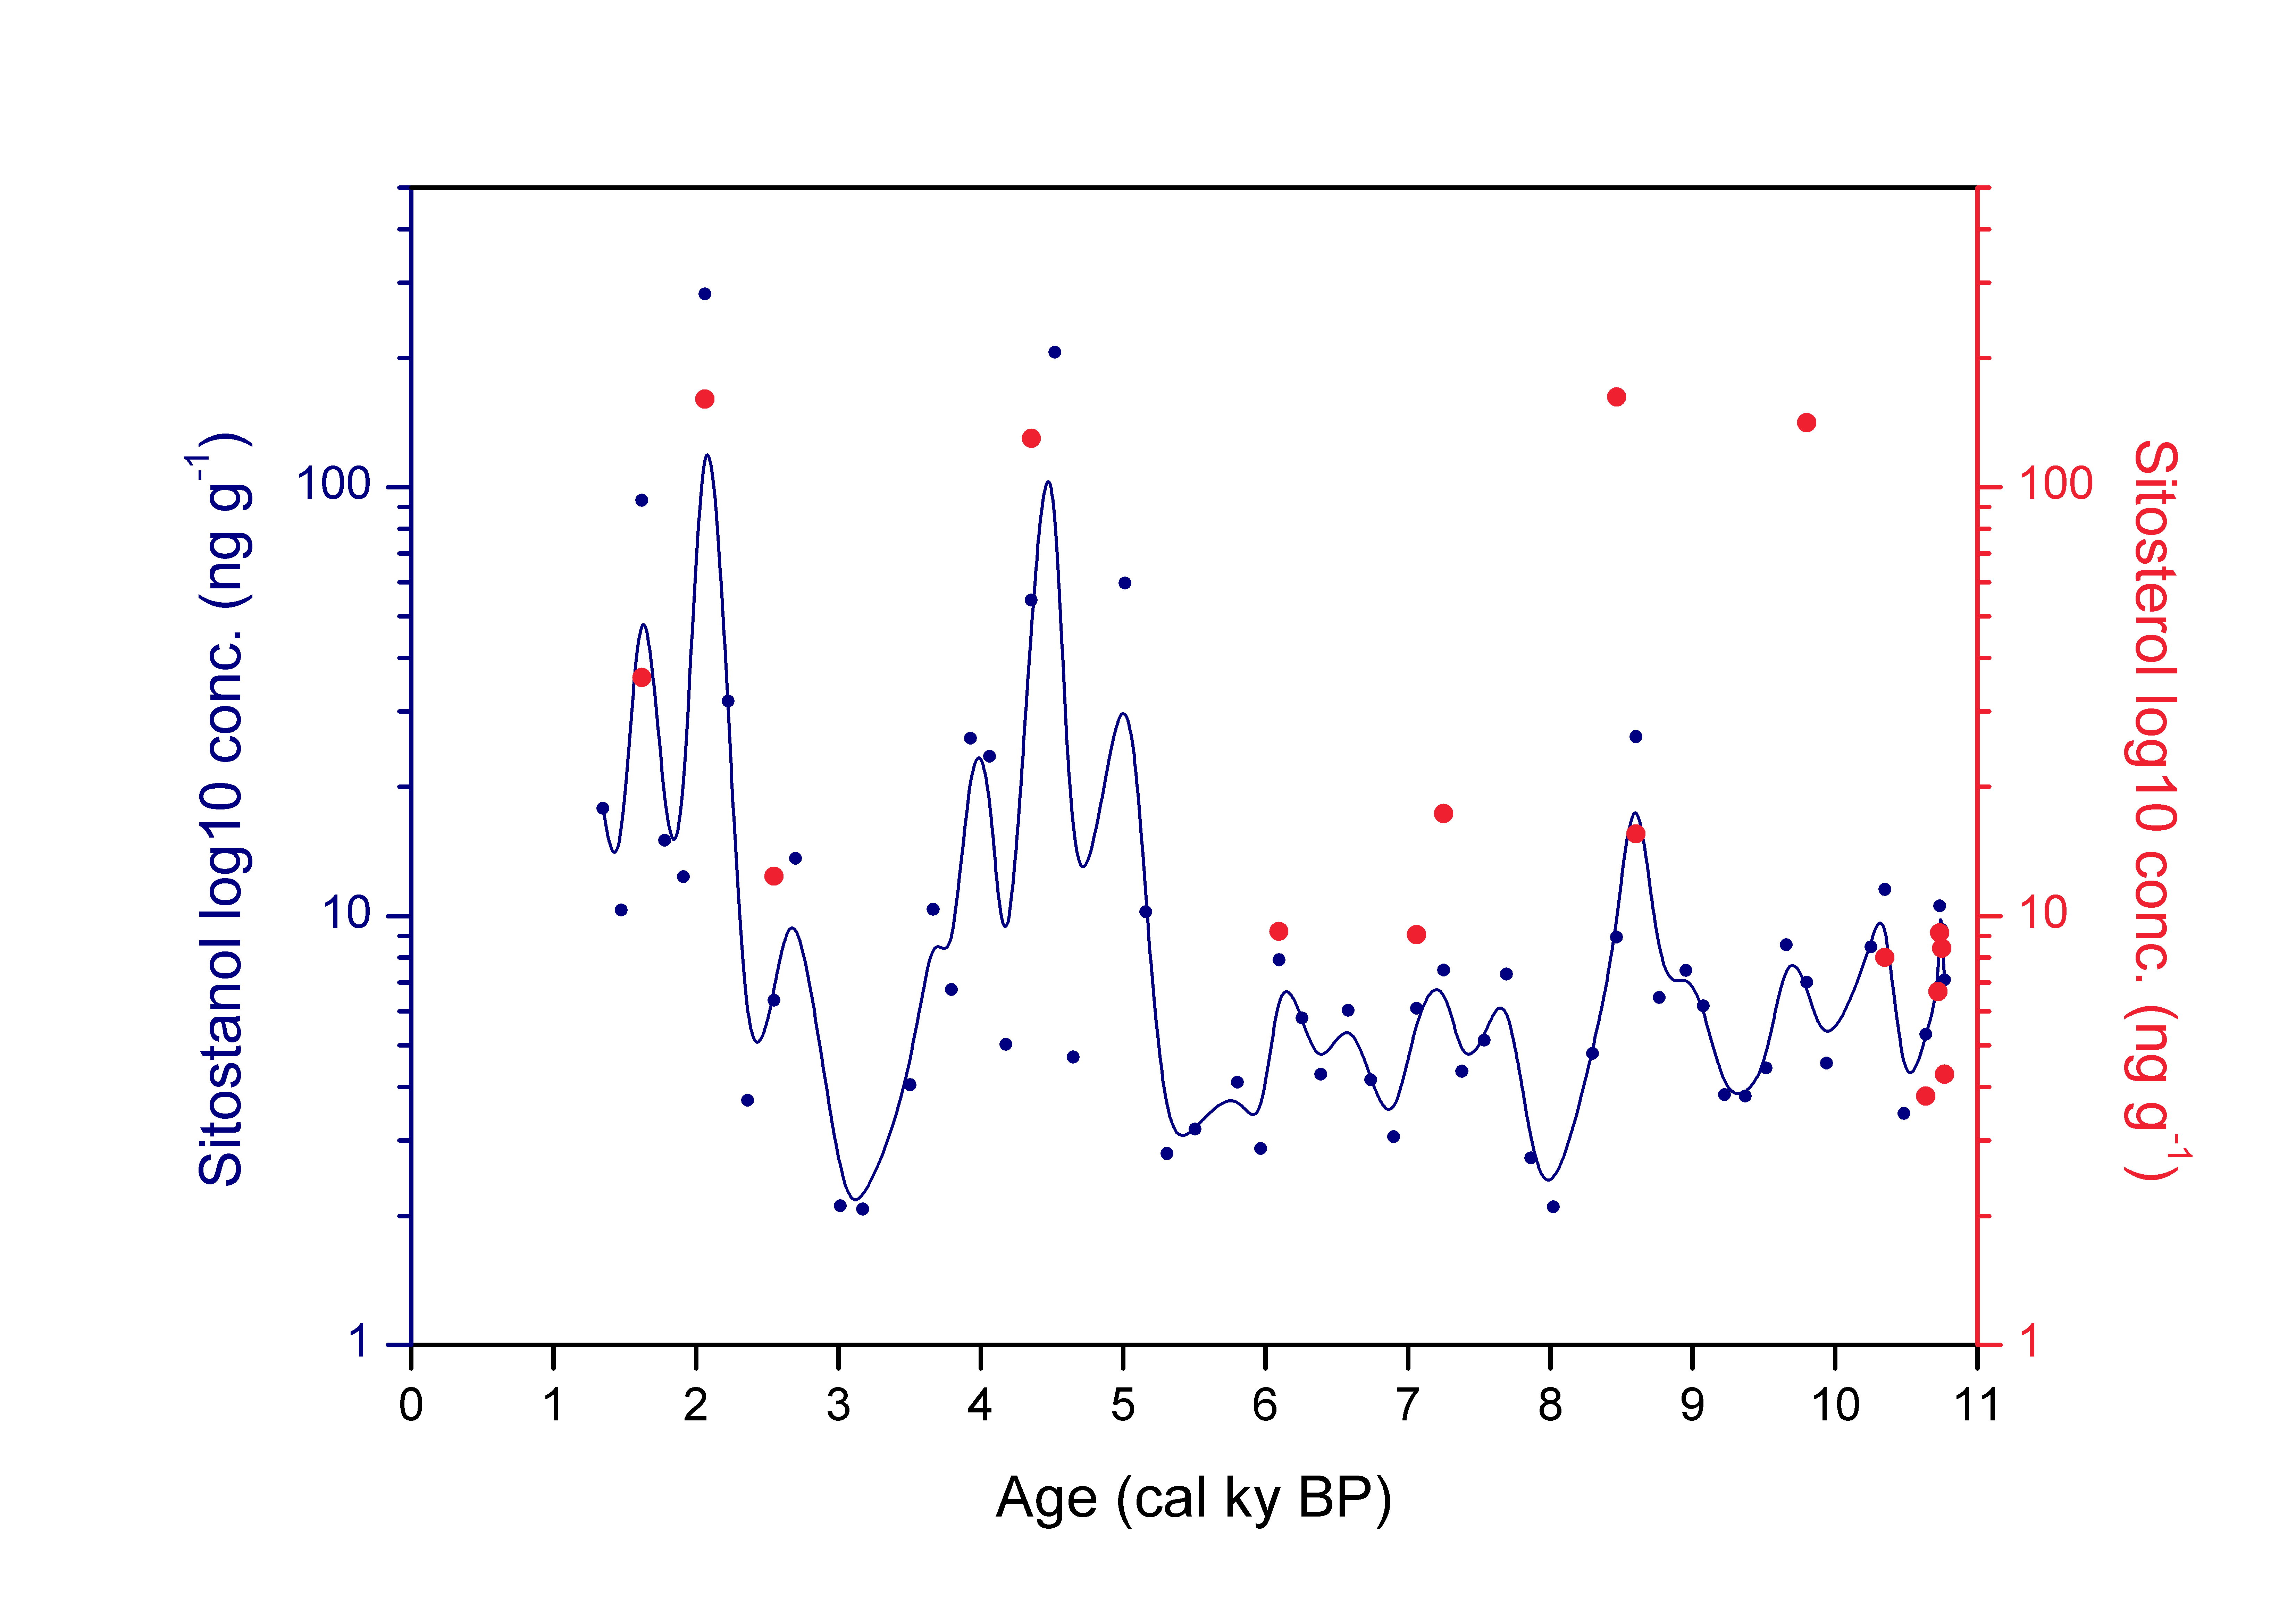


S7: Sitostanol and sitosterol concentrations (log10 ng g-1) in Paru Co sediment core B11. B-spline interpolation for sitostanol.
